# Supplementary material
Source: PubMed Central journal article supplement (PMC7049143)
Supplement: pnas.1913007117.sapp.pdf [file pnas.1913007117.sapp.pdf]

1 **Supplementary Information for**

2

3 **Recent responses to climate change reveal the drivers of species extinction and survival**

4 Cristian Román-Palacios<sup>a</sup> and John J. Wiens<sup>a,1</sup>

5

6 E-mail: wiensj@email.arizona.edu

7

8

9 **This PDF file includes**

10 Text S1–S4.

11 Figure S1.

12 Tables S1–S10.

13

14 **Other supplementary materials for this manuscript include the following.**

15 Datasets S1–S15.

## 16 **Text S1. Extended Methods**

17

### 18 **Text S1.1. Selection of studies**

19 We used studies summarized by Wiens (1), which was based 27 studies testing for climate-  
20 related range shifts, which were found based on a systematic review. That study focused on  
21 studies that included surveys of the “warm edge” of the species ranges on each transect (lowest  
22 elevations or latitudes). However, the species included in that study (1) were not necessarily  
23 biased to show extinctions related to climate change, since they focused on range shifts, which  
24 need not include local extinctions at all (i.e. range shifts might involve only expansion at higher  
25 elevations without extinctions at lower elevations). We specifically focused on those papers  
26 looking at elevational distributions over time in terrestrial environments, given that fewer studies  
27 focused on latitudinal gradients or aquatic species. These papers surveyed local sites over at least  
28 two time periods (at least 10 years apart) and documented whether each species persisted at each  
29 locality over time. We excluded studies that did not provide data on the occurrence of individual  
30 species at individual localities at specific time points (see below).

31 We included data from 10 studies that focused on elevational distributions of terrestrial  
32 plants and animals. From the remaining 17 studies included by Wiens (1), six focused on  
33 freshwater or marine organisms, and the remaining 11 did not provide sufficiently detailed  
34 information on the location of sampling sites and/or species occurrences at those sites.

35

### 36 **Text S1.2. Locality data**

37 We were able to obtain all the necessary information directly from three studies (2–4). In other  
38 cases, the authors provided detailed locality data but did not provide georeferenced coordinates

39 (and declined to make these available when asked). For example, many studies only presented a  
40 map of localities along an elevational transect, and provided the elevation of each locality but not  
41 GPS coordinates. In these cases, we used Google Earth to estimate the coordinates of localities  
42 corresponding to these elevations. We acknowledge that these estimates might not match exactly  
43 the locations of the surveyed sites. However, the main driver of climate among nearby localities  
44 along an elevational transect should be elevation (e.g. general linear models fit between elevation  
45 vs. annual mean temperatures within each of the 10 transects yield  $r^2=0.988-0.989$ , all  $P<0.001$ ).  
46 Therefore, the broad-scale climatic data obtained here should generally correspond to those of  
47 the actual sites, especially at such fine geographic scales. Additionally, we ensured that these  
48 locations were on the same slope (i.e. north facing vs. south facing) as in the original study, since  
49 slope could also impact local climate.

50 Below, we give a detailed description of how we obtained georeferenced locality data for  
51 studies that did not provide site coordinates. Brusca *et al.* (5): because surveys were conducted  
52 along a single road (Catalina Highway, Tucson, Arizona, USA) we used Google Earth to  
53 geocode each sampled based on their elevation. Chen *et al.* (6): We used Figure 1 of that paper  
54 and the elevational data provided therein to estimate coordinates at each sampling site using  
55 Google Earth. Felde *et al.* (7): in their paper, their *SI Appendix*, Table A1 provides details on  
56 both the lowest and highest elevational occurrences of each species. Because surveys were  
57 conducted in a U-shaped valley, the same elevation can be estimated for different localities. We  
58 therefore randomly sampled a single locality among all the possible sites at a given elevational  
59 band. We used the 1' altitude raster for Norway (see  
60 <http://www.viewfinderpanoramas.org/dem3.html>) cropped to the study area (longitude=8.85–  
61 9.13°E; latitude=61.45–61.52°N). Forero-Medina *et al.* (8): we georeferenced the five sampling

62 sites in their study based on their Figure 1 and using Google Earth. Freeman and Freeman (9):  
63 for both transects (Mt. Karimu, Karkar Island), we randomly selected a single site among all  
64 locations at the same elevational band detailed in their supplement. Menendez *et al.* (10):  
65 sampling sites and species ranges were obtained directly from the paper. For several species at  
66 Sierra Nevada, some minimum and maximum elevations did not match those of the surveyed  
67 sites. We therefore used the closest surveyed location to correct the position for these records.  
68 Ploquin *et al.* (11): these authors kindly provided us with their dataset of georeferenced localities.  
69 Coordinates were transformed from UTM coordinates (29N and 30N zones) to WGS84.

70

### 71 **Text S1.3. Climatic data**

72 We obtained climatic data from georeferenced localities using the CRU TS 3.22 dataset (12). We  
73 analyzed CRU NetCDF files for daily mean temperature (CRU code: tmp), monthly average  
74 daily minimum temperature (CRU code: tmn), monthly average daily maximum temperature  
75 (CRU code: tmx), and precipitation (CRU code: pre). Climatic variables were downscaled to 1  
76 km at each surveyed site using the R package Tusk based on WorldClim raster files (13–18). The  
77 resulting dataset provided data on climatic variables for each year between 1901 and 2013 (CRU  
78 dataset) at a high resolution (~1 km at the equator). The historical survey date for one study (7)  
79 falls outside of the available climatic coverage in our dataset (*SI Appendix*, Table S1), but by  
80 only one year. In this case, we assumed analyzed climatic data for the closest date in the dataset  
81 (i.e. 1901 instead of 1900; *SI Appendix*, Table S1). This should have no impact, given the one-  
82 year difference and given that this time period is well before the major global warming caused by  
83 anthropogenic activities. Other potentially relevant datasets either lacked climatic data for exact  
84 dates (e.g. WorldClim), or had such a coarse resolution that it was difficult to distinguish

85 climatic conditions at different sites within the same transect [e.g. 2.5° resolution for  
86 NCEP/NCAR reanalysis (19)].

87         For each site, we fit the Empirical Mode Decomposition (EMD) model using the R  
88 package EMD (20) based on the entire CRU temporal window [i.e. oldest and modern survey  
89 dates (22)]. We used default parameters in the function `emd`, which are optimized for detrending  
90 noise from climatic time series [see below (20,21)]. When sampling was conducted over multiple  
91 years for either the historical survey or modern resurveys, we selected the oldest year for the  
92 historical survey, and the most recent date for the resurvey (see below for justification).

93         EMD reduces the effect of year-to-year stochasticity on the estimated value of each  
94 climatic variable for each year (21). Many other methods are currently available to extract long-  
95 term trends from climatic data [e.g. regression (22,23), moving mean (24,25), Fourier-based  
96 filtering (26)]. However, EMD has shown to be especially accurate for extracting signal from  
97 nonlinear and nonstationary datasets, such as climate (21,27,28). EMD does not use a fixed set of  
98 “windows” to extract climatic trends. Instead, the number (frequency) and duration (amplitude)  
99 of temporal windows depend on the analyzed dataset (21,28). EMD has been shown to be a  
100 reliable method for removing stochastic noise from climatic data (21,27–31). Moreover, this  
101 approach has been widely used for climatic data. For example, the first paper using the EMD  
102 approach for climate-change research (21) has been cited 650 times already, as of November  
103 2019.

104         Nevertheless, we performed additional analyses based on datasets that summarize mean  
105 climatic values for each variable during a 5-year window preceding each survey, and a 10-year  
106 window. Results based on these analyses are summarized and compared to those from EMD in

107 *SI Appendix*, Text S3.3. These results were generally similar to those based on EMD, especially  
108 those using the 10-year window

109         After use of EMD, we then followed the variable definitions in O’Donnell and Ignizio  
110 (32) to calculate 19 climatic layers (Bioclim variables Bio1–Bio19; see *SI Appendix*, Table S2).  
111 Thus, we focused on climatic variables that have been previously hypothesized to represent  
112 important drivers of species geographic distributions (33).

113

#### 114 **Text S1.4. Data analysis**

115 We generated four datasets to describe the climate at each locality over time, for each of the 19  
116 Bioclim variables (*SI Appendix*, Table S2): (i) historic (for the year of the initial survey of the  
117 site); (ii) modern (the year of the resurvey); (iii) absolute change over time (difference between  
118 the historic and modern values); and (iv) rate of change (absolute change between surveys  
119 divided by the time interval between surveys, which is the date of the resurvey minus the date of  
120 the original survey).

121         In four of the 10 analyzed studies, the initial surveys for each site were conducted over  
122 the course of two years (*SI Appendix*, Table S1). For these studies, we selected the earlier date  
123 for analyses (e.g. 1981 for surveys conducted over 1981–1982; *SI Appendix*, Table S1). One  
124 study (10) had initial surveys conducted over two decades (1980s, 1990s), but each site was  
125 sampled in a specific two-year period, and so we used the appropriate set of dates for each site.  
126 One resurvey spanned two consecutive years (10) and here we selected the later date (i.e. 2007  
127 for 2006–2007). Overall, this strategy spanned the maximum range of dates. However, our  
128 choice of years should have very little impact on the results, given the relatively long time

129 periods between surveys, and that we used EMD to reduce the stochastic effects of year-to-year  
130 climate on long-term trends.

131 We used two approaches to estimate the potential importance of each climatic variable  
132 for local extinctions. For the first approach, we focused on whether there was any local  
133 extinction among any of the species surveyed at a local site, and which climatic variables  
134 predicted which sites experienced these local extinctions. For the second approach, we tested for  
135 relationships between climatic variables and the frequency of local extinction among all the  
136 species surveyed at each site. Although this second approach might initially seem more  
137 appropriate, local extinctions were entirely absent at the majority of sites (75%). Therefore, our  
138 analyses in the main text focused on predicting which sites had any local extinctions at all, rather  
139 than on the frequency of local extinction among sites.

140

#### 141 **Text S1.4.1. Occurrence of local extinction**

142 We used a binary coding to analyze which climatic variables were associated with local  
143 extinctions among sites. Specifically, sites were coded based on whether or not at least one  
144 species experienced local extinction at that locality. We then used Discriminant Analysis of  
145 Principal Components (DAPC) to determine the variables that best differentiated between sites  
146 with and without local extinction. DAPC finds the linear combination of variables that  
147 maximizes the difference between groups and minimizes within-group variances. The two  
148 groups here are sites with and without local extinctions. DAPC were fit independently for three  
149 climatic datasets (i.e. historical, absolute change, and rate of change) using the R package  
150 adegenet (34), after scaling each variable, and retaining the number of principal components  
151 associated with the optimal alpha score [using the optim.a.score function in the same package;

152 (35)]. The estimated importance of each climatic variable in differentiating between sites with  
153 and without local extinction within each dataset is summarized as a DAPC loading (*SI Appendix*,  
154 Table S3). Variables with larger DAPC loadings are better at discriminating between sites with  
155 and without local extinction. We focused primarily on the variables with loadings in the top 95<sup>th</sup>  
156 percentile in each dataset. The top predictors of local extinction were generally similar across the  
157 three datasets (*SI Appendix*, Figure S1).

158 No *P*-values are associated with DAPC analyses. Therefore, we used univariate logistic  
159 regression models to test for significant effects of each climatic variable on the occurrence of  
160 local extinction across sites. We fit univariate generalized lineal models in R version 3.4.2 (15).  
161 We summarized the estimated odds ratio for every climatic variable. In this case, odds ratios  
162 smaller than one indicated an inverse association between the predictor variables and local  
163 extinction across sites. Conversely, odds ratios larger than one indicated that increases in the  
164 predictor values are associated with a higher likelihood of local extinction.

165

#### 166 **Text S1.4.2. Frequency of local extinctions**

167 For our second approach, we summarized the frequency of local extinctions at each site and then  
168 tested which climatic variables were most strongly related to these extinction frequencies. To  
169 estimate the frequency of local extinction at each site, we divided the total number of species that  
170 were locally extinct at that site (based on the resurvey) by the total number of species that were  
171 historically present (based on the original survey). We then used two methods to infer  
172 relationships between extinction frequencies and climatic variables among sites.

173 First, we used a multivariate approach to estimate the relative importance of each climatic  
174 variable. This approach accounted for the correlated structure of the predictors in our dataset (i.e.



175 the 19 climatic variables). Specifically, we assessed variable importance using the Lindeman,  
176 Merenda, and Gold (LMG) index, estimated from alternative multiple linear regression models  
177 (36–39). The LMG index is calculated as the difference in  $r^2$  from adding the analyzed predictor  
178 to a model containing a subset of the other variables. Next, the LMG is computed for the  
179 analyzed predictor by computing the average difference in  $r^2$  over all possible model subsets  
180 (36–39). Better predictors have larger values for the LMG index. The LMG index was calculated  
181 using the `calc.relimp` function in the R package `relaimpo` (36–39). LMG estimates for each  
182 variable are summarized in Dataset S4.

183         Second, we fit univariate linear regression models for the relationship between the  
184 frequency of local extinction at each site and each of the climatic variables (independently for  
185 each climatic variable). Univariate regression models were fit using the `lm` function in R version  
186 3.4.2 (15). These models were not used to estimate the relative importance of each climatic  
187 variable in predicting extinction frequencies (given potential correlations among variables).  
188 Instead they were used to test relationships between climate and extinction for variables  
189 identified from the LMG analysis. For those variables found to be most important using LMG  
190 (top 95<sup>th</sup> LMG index within each climatic dataset; Dataset S4), we also report the univariate  
191 regression results (i.e. slope,  $r^2$ ,  $P$ ).

192         Overall, results based on extinction frequencies were similar to those based on the  
193 presence/absence of local extinction among sites. Based on the variables with the highest LMG,  
194 sites with higher frequencies of local extinction were warmer during the initial historical survey  
195 of each site, relative to sites with lower extinction frequencies (historical mean annual  
196 temperature, Bio1: LMG=8.15%, slope=0.015,  $r^2$ =0.169,  $P$ <0.001; historical maximum annual

197 temperature, Bio5: LMG=6.37%, slope=0.019,  $r^2=0.134$ ,  $P<0.001$ ; historical minimum annual  
198 temperature, Bio6: LMG=11.66%, slope=0.013,  $r^2=0.190$ ,  $P<0.001$ ; Dataset S4).

199         When analyzing changes in climate between surveys (both the absolute change and rate  
200 of change), we found that the change in annual temperature range (Bio7) was the best predictor  
201 of extinction frequencies across sites (absolute change in Bio7, LMG=17.39%, slope=0.142,  
202  $r^2=0.194$ ,  $P<0.001$ ; rate of change in Bio7, LMG=20.82%, slope=3.577,  $r^2=0.129$ ,  $P<0.001$ ).  
203 However, because this variable is defined as the difference between annual maximum (Bio5) and  
204 minimum temperatures (Bio6; *SI Appendix*, Table S2), we examined whether increases in Bio7  
205 were primarily driven by increases in Bio5 (maximum temperature) or decreases in Bio6  
206 (minimum temperature). We found that the increase in maximum annual temperature (Bio5) was  
207 the main driver of the change in Bio7 (Dataset S4). For the absolute change in climate, we found  
208 that the second best predictor of the frequency of local extinctions was maximum temperature  
209 (LMG for absolute change in Bio5=9.14%, for absolute change in Bio6=4.81%). Linear  
210 regression models fit between extinction frequency and climatic variables also indicated that  
211 sites with higher extinction frequencies had smaller changes in minimum temperatures between  
212 surveys (absolute change in Bio6, slope=-0.720,  $r^2=0.091$ ,  $P<0.001$ ) but larger changes in  
213 maximum temperatures (absolute change in Bio5, slope=0.359,  $r^2=0.114$ ,  $P<0.001$ ).

214         We also found similar results based on the rate of change in climate, which also indicated  
215 that Bio5 was the main driver of change in Bio7. First, the rate of change in Bio5 is a better  
216 predictor of local extinctions relative to rate of change in Bio6 (LMG for rate of change in  
217 Bio5=17.21%, Bio6=5.26%). Second, sites with higher frequencies of local extinction  
218 experienced slower changes in Bio6 (rate of change in Bio6: slope=-3.934,  $r^2=0.053$ ,  $P<0.001$ ),  
219 but faster changes in Bio5 (rate of change in Bio5: slope=6.385,  $r^2=0.111$ ,  $P<0.001$ ).

220 Finally, although mean annual temperature (Bio1) was not a top variable picked by the  
221 LMG index, we found that sites with higher extinction frequencies had significantly less change  
222 in mean annual temperature between surveys (absolute change in Bio1 slope=-0.198,  $r^2=0.176$ ,  
223  $P<0.001$ ; Dataset S4). This result is congruent with those based on the occurrence of local  
224 extinction across sites (see main text; Fig. 1; *SI Appendix*, Fig. S1).

225

### 226 **Text S1.5. Projected climate change and extinction**

227 We explored the potential effects of projected climate change on overall extinction within  
228 transects for the year 2070, based on patterns of extinction and dispersal in the recent past.  
229 Climatic conditions for 2070 were estimated by averaging projected maximum temperatures  
230 between 2061 and 2080. Note that here and throughout this section, when we refer to species  
231 distribution and extinction, we are specifically referring to their distribution and extinction  
232 within the elevational transect in which they were studied.

233 Predicted climatic conditions at each sampled site for 2070 were obtained using the  
234 WorldClim raster files at a 0.5' resolution [ $\sim 1$  km at the equator (13)]. We analyzed projected  
235 climate change scenarios (14) based on the combination of up to 19 General Circulation Models  
236 (GCMs) and four different Representative Concentration Pathways (RCPs). Results presented in  
237 the main text are based on an intermediate scenario of predicted climate change (RCP4.5), and a  
238 second scenario that assumes minimal or no mitigation of climate change during the next few  
239 decades, and thus much more extensive climate warming (RCP8.5). For each of these scenarios,  
240 we followed standard practice (40,41) and estimated extinction for each RCP based on the mean  
241 of estimates derived from all available GCMs (*SI Appendix*, Tables S4, S7–S9). The RCP4.5  
242 scenario of predicted climate change has been widely used for predicting the impacts of future

243 climate change on species distributions (42–44). This scenario is congruent with the currently  
244 implemented policies related to greenhouse emissions (45). The RCP8.5 scenario assumes an  
245 overall increase in greenhouse gas emissions during the next several decades. Unfortunately, this  
246 scenario has recently been indicated as being highly likely given trends in greenhouse gas  
247 emissions over the past two decades (46,47).

248         We generated results for all four available RCPs, but we did not focus our main results on  
249 RCP2.6 or RCP6.0. The RCP2.6 scenario assumes a significant decrease in carbon emissions and  
250 is therefore currently considered to be unrealistic (46–48). Achieving the goals that are assumed  
251 by the RCP2.6 scenario would require participation of all countries in global policies directed  
252 toward mitigating climate change effects, a reduction in greenhouse gas emissions by 70%  
253 (relative to the early 2000s), and major changes in energy use (49). Additionally, 21% of GCMs  
254 (4 of 19 GCMs) are not available under this scenario (RCP2.6). Results for the RCP6.0 scenario  
255 are represented in the range provided by RCP4.5 and RCP8.5. Furthermore, 37% of GCMs (7 of  
256 19) are lacking for RCP6.0 (37,49). In contrast, at least 90% of GCMs are available for both  
257 RCP4.5 (19 of 19 GCMs) and RCP8.5 (17 of 19 GCMs).

258         Based on the different future climate projections (12–19 GCMs and four RCPs), we  
259 analyzed four different aspects of species responses to projected climate change. First, we  
260 estimated the minimum change in maximum annual temperatures that species will likely  
261 experience in a given time period (given our result that maximum annual temperature is  
262 generally the most important predictor of local extinctions; see main text). For this, we estimated  
263 the difference between the predicted and current maximum annual temperatures across the  
264 species' current geographical range (see details below). Second, we analyzed the role of  
265 dispersal in potentially allowing species to avoid extinction within transects by moving upwards

266 in elevation and tracking their current climatic niche. Third, we examined the change in  
267 maximum annual temperatures that local populations have tolerated in the past without going  
268 extinct (niche shifts). Fourth, we examined the combined effects of dispersal and niche shifts in  
269 reducing the likelihood that a species will go extinct within their transect.

270

#### 271 **Text S1.5.1. Minimum increase in maximum annual temperatures**

272 For each species, we evaluated whether the maximum annual temperatures that are present  
273 across their current elevational range (at the time of the resurvey) will still be present within their  
274 current elevational range in the future. Here and throughout, “current” refers to the time of the  
275 relevant resurvey for each species and site. For each species, we first estimated the current  
276 maximum annual temperatures at each site across their current distribution. Next, we used the  
277 predicted maximum annual temperatures for 2070 to estimate future annual maximum  
278 temperatures at each site across their current distribution. If no overlap was found between the  
279 future and current maximum annual temperatures across the species current distribution, we  
280 considered the species to be exposed to unsuitable conditions across their current range (within  
281 the transect).

282       Next, for those species predicted to be exposed to unsuitable maximum annual  
283 temperatures throughout their current distribution on the transect, we estimated the minimum  
284 difference between current and future maximum annual temperatures across their current  
285 distribution. Specifically, the minimum difference was estimated by subtracting the current value  
286 of the maximum annual temperature at the species’ current warmest site in their geographic  
287 range on the transect (i.e. based on the time of the resurvey) from the projected maximum annual  
288 temperature (for 2070) at the coldest site in their current range.

289 We assumed that species are potentially able to survive the minimum shift in maximum  
 290 annual temperatures in their current range by either dispersing to higher elevations, tolerating  
 291 higher temperatures (niche shift), or by doing both simultaneously. The analyses described below  
 292 explore each of these three possibilities.

293

#### 294 **Text S1.5.2. Dispersal**

295 We assessed whether species are likely to be able to disperse fast enough to avoid extinction  
 296 within their transects by 2070. First, we estimated the absolute change in the upper limit of the  
 297 elevational range for each species that expanded its upper elevational range between surveys. To  
 298 do this, we subtracted the historical maximum elevation of the species' distribution on the  
 299 transect (i.e. from the time of the initial survey) from the current maximum record (i.e. from the  
 300 time of the resurvey). Then, the rate of upward dispersal was estimated by dividing the absolute  
 301 change in maximum elevation between surveys by the time between surveys. Again, when  
 302 surveys were conducted over multiple dates (*SI Appendix*, Table S1), the time between surveys  
 303 was calculated based on the earliest date of the historical survey, and the latest date of the  
 304 modern resurvey (see Data Analysis section above for details).

305 Next, we estimated the amount of cooling that can potentially be gained through upward  
 306 dispersal in the future (2070) using the following equation (units are indicated in parentheses;  
 307 time is in years):

308

$$309 \quad \textit{Potential cooling} (sp_i, t) = \textit{upra}_{sp_i} (\text{m/year}) * \Delta\text{Bio5}_{\text{transect}(sp_i)} (\text{°C/m}) * (t - \text{mod}_i)$$

310

311 Specifically, for each species ( $sp_i$ ) that was recorded as dispersing upward in the past  
312 (between surveys), we multiplied the upward dispersal rate ( $upr_i$ ) by the mean change in  
313 maximum annual temperatures (Bio5) with elevation across the species' elevational transect  
314 ( $\Delta Bio5_{\text{transect}(sp_i)}$ ; see regressions for each transect in *SI Appendix*, Table S6), and by the number  
315 of years between the year of the modern survey ( $mod_i$ ) and the future date ( $t=2070$ ). The final  
316 units for potential dispersal-related cooling are in °C.

317 For each of the upward-dispersing species, we evaluated whether this potential cooling  
318 gained through upward dispersal could be as large as the change in maximum annual  
319 temperatures over time. We focused on two alternative scenarios. First, an unconstrained  
320 scenario in which species disperse upwards with no spatial constraints. Second, a scenario where  
321 the height of each mountain range (on which the elevational survey was performed) constrained  
322 the amount of cooling that can be gained through upward dispersal. The latter scenario is clearly  
323 more realistic (50).

324 Unconstrained scenario: For each upward-dispersing species, we evaluated whether the  
325 cooling gained through recent dispersal (between surveys) was larger than the predicted  
326 minimum change in maximum annual temperatures for 2070. If the cooling gained through  
327 upward dispersal was larger than the predicted minimum change, we considered dispersal to  
328 potentially be fast enough for the species to remain within their current niche for maximum  
329 annual temperatures.

330 Constrained scenario: We evaluated if the mountaintop-constrained cooling gained  
331 through upward dispersal was larger than the minimum change in maximum annual temperatures  
332 predicted by 2070. For each species, the maximum cooling gained through dispersal was  
333 constrained to be equal to the difference between the current maximum annual temperature at the

334 upper limit of their current range and the predicted maximum annual temperature at the  
335 mountaintop by 2070. To obtain the maximum annual temperatures at the mountaintop by 2070,  
336 we used Google Earth to estimate the latitude and longitude for this site (see Dataset S1 and *SI*  
337 *Appendix*, Table S6), and then obtained climatic data for this site using the WorldClim  
338 projections for maximum annual temperature for 2070. Again, we assumed that if the niche-  
339 cooling gained through dispersal was larger than the predicted minimum shift in maximum  
340 annual temperatures over time, then species could remain within their current niche for  
341 maximum annual temperature in 2070.

342 Finally, we analyzed the potential effects of dispersal in allowing species to persist within  
343 their current climatic niches based on all species in the dataset ( $n=538$ ; *SI Appendix*, Table S8),  
344 and not only upward-dispersing species. We analyzed three scenarios to address species that did  
345 not disperse upwards between surveys. First, we assumed that species that did not previously  
346 disperse upwards (at their upper elevational range limits) between surveys would not disperse  
347 upwards in the future. Second, we assumed that these previously non-dispersing species would  
348 instead move upwards at the mean upward rate across all species that dispersed (including  
349 downward dispersal as negative values when calculating the mean). Specifically, for downward-  
350 dispersing species, we calculated the change between surveys in their maximum elevation, just  
351 as we did for upward dispersing species, but these downward changes yield negative values.  
352 Note that “downward dispersal” most likely occurred through range contractions at the upper  
353 elevational range edge, but this pattern is clearly inconsistent with upward dispersal. Third, we  
354 assumed that these previously non-dispersing species would instead move upwards at the mean  
355 upward rate across all species (counting non-dispersing species as zero when calculating the  
356 mean, counting species that dispersed downwards at the cool edge as negative, and counting



357 species that dispersed upwards as positive). We performed the same set of analyses described  
358 above for each of these three scenarios, evaluating whether the niche-cooling gained through  
359 dispersal was larger than the predicted minimum shift in maximum annual temperatures by 2070,  
360 thus allowing species to remain in their current climatic niche for maximum temperatures.  
361 Extinction frequencies under each of these scenarios were also calculated under a constrained  
362 and unconstrained scenarios based on species current distances to the top of the mountain range  
363 on which the surveys were performed.

364 We acknowledge that a species might not be able to survive very long as a single  
365 population on a small mountaintop, and so projecting long-term species survival based on this  
366 scenario might seem unrealistic. However, our results suggest that most species are not likely to  
367 avoid extinction under the constrained dispersal scenario anyways, especially after including the  
368 many species that did not disperse upwards between surveys. Furthermore, most species that are  
369 projected to be limited in their upward dispersal by mountaintop height are projected to go  
370 extinct (see *SI Appendix*, Text S2 below). Therefore, the question of whether long-term species  
371 survival on a small mountaintop is realistic or not may be largely moot.

372

### 373 **Text S1.5.3. Niche shift**

374 We estimated how much change in maximum annual temperature (Bio5) has typically caused  
375 local extinction at the warmest edges of species ranges, and then we used this value to evaluate  
376 whether populations will be exposed to similar levels of warming throughout their ranges by  
377 2070. Note that a change in temperature that a species experiences without going extinct can be  
378 considered a niche shift. In other words, the set of macroclimatic conditions that the species can  
379 tolerate has expanded to encompass these new conditions, either through evolutionary or plastic

380 change (the latter might occur if the new conditions are actually within the species' fundamental  
381 climatic niche, even if those conditions were not within the current realized niche).

382 For each species, we first estimated the absolute change between surveys in maximum  
383 annual temperature at the warmest site in their range where they occurred in the initial survey.  
384 Note that for species in which local extinctions occurred, these extinctions generally occurred at  
385 the warmest site in the species range (191 of 239), with extinctions at additional sites (usually  
386 adjacent ones) in some cases. We then fit a logistic regression model between the occurrence of  
387 local extinction and the absolute change in maximum annual temperature at the warmest site in  
388 the species historical range (i.e. at the time of the initial survey). This model (odds=3.517;  
389  $P<0.001$ ) was then used to estimate the temperature associated with a given probability of local  
390 extinction occurrence, by calibrating a binomial assay in the `dose.p` function from the R package  
391 MASS (51). Our main analyses were based on the temperature change associated with a  
392 probability of local extinction of 0.95. We assumed that species would not be able tolerate  
393 changes exceeding this value. However, it is possible that there could be more widespread  
394 extinctions associated with a smaller temperature change. Therefore, we also estimated the  
395 change in maximum annual temperature associated with a 0.5 probability of local extinction (but  
396 assuming only 50% of species would go extinct with this level of change). Results for both  
397 thresholds are presented in the supplemental files (*SI Appendix*, Tables S7, S9; Datasets S7–  
398 S10). All analyses included all 538 species, regardless of whether or not they experienced local  
399 extinction at their warmest site.

400 Finally, for each species we evaluated whether they are likely to be able to tolerate the  
401 minimum change in maximum annual temperatures across their range by 2070. We assumed that  
402 species will be able to tolerate shifts in maximum annual temperatures (Bio5) across their range

403 that are below the estimated threshold that generally caused local extinctions (0.95; see above).  
404 Specifically, we compared this threshold to the minimum change in maximum annual  
405 temperatures each species is projected to experience in their range on the transect. We  
406 considered species to be likely to persist in their transect if the minimum change in maximum  
407 temperatures was below the estimated threshold generally leading to local extinction. We also  
408 performed analyses using a threshold associated with a 0.50 probability of local extinction. For  
409 these analyses, we assumed that only 50% of the species would go extinct in their transect based  
410 on this level of temperature change. Therefore, we divided the initial estimated frequency of  
411 extinction under each scenario (Datasets S8–S10) by two. The corrected frequencies of  
412 extinction are summarized in *SI Appendix*, Table S10 for each climatic scenario. Note that we do  
413 not present estimates of extinction for each species separately using the 50% threshold. Instead,  
414 we present overall frequencies across all the species that are projected to be unable to disperse  
415 quickly enough to remain within their current niche for maximum annual temperature.

416

#### 417 **Text S1.5.4. Simultaneous effects of dispersal and niche shifts**

418 We analyzed the extent to which the combined effects of dispersal and niche shifts can  
419 potentially reduce species extinctions within transects. Above, we estimated the minimum shift  
420 in maximum annual temperatures that each species will likely experience, the potential decrease  
421 in maximum temperature caused by upward dispersal (based on their past rates of upward  
422 dispersal), and the change in maximum annual temperatures at local sites that is likely to cause  
423 local extinction (using two different probability thresholds for local extinction, 0.50 and 0.95).  
424 For the final set of analyses, we evaluated whether the minimum change in maximum

425 temperatures that species will experience will be below the threshold for local extinction, after  
426 incorporating the potential cooling caused by upward dispersal.

427         We performed three sets of analyses, corresponding to different ways of dealing with the  
428 large number of species ( $n=252$ ) that failed to disperse between surveys in the past (see above).  
429 In the first set, we assumed that species that did not disperse upwards previously will not  
430 disperse upwards in the future. Second, we assumed that these non-dispersing species will  
431 instead move upwards at the mean upward rate across all species that dispersed between surveys  
432 in the past (including downward dispersal at the cool edge as negative values when calculating  
433 the mean). Third, we assumed that these previously non-dispersing species would move upwards  
434 at the mean upward rate estimated across all species (counting non-dispersing species as zero  
435 when calculating the mean, counting species that dispersed downwards at the cool edge as  
436 negative, and counting species that dispersed upwards as positive).

437         Finally, for each of these three scenarios, we considered dispersal to be constrained by  
438 the maximum height of the mountains on which surveys were performed. For this constrained  
439 scenario, we assumed that maximum cooling for upward-dispersing species is restricted by the  
440 predicted temperatures at the maximum elevation on the mountain range by 2070.

## 441 **Text S2. General Methodological Issues**

442 Below, we discuss several methodological issues that are potential sources of bias in our study.  
443 First, our dataset may include false extinction events. These would occur if a species was not  
444 found during the resurvey at a given site, even though it was actually present. We suggest that  
445 these false extinctions did not dominate our results. Most local extinctions were inferred based  
446 on the absence of a species at the warmest edge (i.e. lowest elevation) of its original elevational  
447 range on the transect. This is where extinctions are expected under global warming, given that  
448 these sites may have (or be close to) the hottest climates that each species can tolerate, prior to  
449 major climate change. We found that 84.5% of the species that were inferred to have one or more  
450 local extinctions between surveys had local extinctions at the warmest site in their original range  
451 on the transect (202 of 239 species; Datasets S1–S2). In contrast, false extinctions due to failure  
452 to detect a species at a given site could occur anywhere on the transect, and are not expected to  
453 be concentrated at the warm edge of the species range. Furthermore, if false extinctions  
454 dominated our data, then one would not expect particular climatic variables to be significantly  
455 associated with local extinctions. Instead, we found significant associations between increases in  
456 certain temperature variables and local extinctions.

457 In a similar vein, we assume that these local extinction events are actually caused by  
458 changes in climate. It is possible that some local extinction events were related to habitat  
459 modification or other factors. However, this possibility was generally addressed in the 10  
460 original studies that our analyses are based on. In short, these authors concluded that range shifts  
461 were related to climate and not other factors, and these authors surveyed these locations  
462 themselves. Moreover, these surveys were generally conducted in reserves and other protected  
463 and/or undeveloped areas. Two studies conducted in Europe included sites with human impacts

464 such as grazing and selective logging (7,11). However, in the study by Felde *et al.* (7), the  
465 authors specifically addressed the idea that changes in grazing at some sites might have impacted  
466 their results, and they provided evidence against this idea. Furthermore, in that study, only a tiny  
467 fraction of the sites had any local extinctions at all (2.8%) and few species experienced local  
468 extinctions (8.6%). Thus, the overall pattern in that study was of species' robustness to climate  
469 change, rather than widespread local extinctions that were possibly caused by human impacts. In  
470 the study by Ploquin *et al.* (11), many species did experience local extinction, but the authors  
471 specifically addressed whether these were caused by major changes in habitat over the relatively  
472 brief time between surveys (~20 years), and they suggested that habitat loss and/or fragmentation  
473 did not explain their results. Overall, the idea that habitat modification in these two studies  
474 explains our main conclusions seems very unlikely. Nevertheless, in a dedicated section below  
475 (*SI Appendix*, Text S4), we specifically tested the impact of excluding the sites with local  
476 extinction from these two studies (*SI Appendix*, Text S4). The results show that the exclusion of  
477 these sites has little impact on our overall conclusions. Finally, as described above, if non-  
478 climatic factors generally explained these local extinctions, it is unclear why these extinctions  
479 would be concentrated at the warm edge of species ranges and would be significantly related to  
480 climatic variables.

481         We also acknowledge that our study does not address the specific mechanisms by which  
482 changes in climate caused local extinctions, even though we identified the climatic variables that  
483 seem to best predict these extinctions. Climate may lead to local extinction through a variety of  
484 proximate causes (52), including temperatures that exceed the physiological tolerances of  
485 individuals and climate-related changes in species interactions (e.g. disease, reductions in prey or  
486 host species). We also note that there may be different demographic causes of local extinction,

487 including the death of adult individuals, failure to successfully reproduce, or failure to  
488 successfully recruit the next generation. Importantly, we acknowledge that behavioral habitat  
489 selection is a potential explanation for local extinction for some organisms (like birds), but not  
490 for others (like plants). That is, a given animal species may no longer occur at a site simply  
491 because individuals choose to occur elsewhere, not because they are unable to tolerate climatic  
492 conditions there. Nevertheless, it is unclear why species would abandon sites where they can still  
493 survive and maintain viable populations. Furthermore, habitat selection to avoid warming  
494 habitats could presumably lead to massive reductions in the species range and population size,  
495 even if species could actually tolerate many of the sites that they chose to avoid. Overall, it  
496 clearly would be beneficial to know the detailed causes and mechanisms of local extinctions for  
497 the hundreds of species included here. Yet, we think it is still possible to make inferences about  
498 which climatic factors are most strongly related to local extinction (and how future climates may  
499 impact species survival) without these details.

500         We also note that we have focused on identifying which climatic variables seem to be the  
501 most generally important in predicting local extinctions. However, we acknowledge that a  
502 combination of climatic factors might be important in driving extinction in many cases.

503         There could also be substantial variation in the climatic drivers of local extinction among  
504 species and among sites. An alternative approach to analyzing the data would therefore be to  
505 conduct analyses only within a given study (i.e. one transect, one group of organisms). This  
506 approach would have some advantages, but it would be difficult to incorporate studies with  
507 fewer sites (*SI Appendix*, Table S1), given limited statistical power (see also below).  
508 Furthermore, synthesizing results across the different sites would not be straightforward.

509 We acknowledge that our results could be influenced by different climatic drivers in  
510 different regions or among taxonomic groups. Specifically, our dataset was dominated by  
511 tropical species but temperate sites. Species on transects in tropical/subtropical locations (<35°  
512 absolute latitude) with local extinction represented 82% of the species with local extinction in  
513 our dataset (198 of 240 species with local extinction), whereas temperate sites (>35° absolute  
514 latitude) comprised 75% of the sites with local extinction (111 of 148 sites with local extinction).  
515 Similarly, animals represented 75% of the sampled species (406 animal species of 538 total  
516 species), and 90% of species with local extinctions (216 of 240 species with local extinction).  
517 Plants were sampled at 323 sites whereas animals were sampled at 258. Preliminary analyses  
518 showed broadly similar patterns in terms of climatic drivers of extinctions in animals versus  
519 plants and tropical versus temperate sites. However, formal statistical analyses of each climatic  
520 region and group separately would currently be somewhat problematic given the limited numbers  
521 of tropical sites and of plants with local extinction. Both multivariate (e.g. DAPC) and univariate  
522 analyses (e.g. logistic regressions) generally require 4–5 more observations than variables  
523 (53,54) or at least 100 observations per category (55,56). In our case here, observations would be  
524 sites, or sites with local extinction. Nevertheless, we did confirm that changes in maximum  
525 annual temperature were significantly associated with local extinctions in both tropical and  
526 temperate regions when sites from these regions were analyzed separately, whereas increases in  
527 annual mean temperatures were not associated with local extinction in either climatic zone (see  
528 main text).

529 An important assumption in our projections of future species survival on transects is that  
530 species will disperse upwards along elevational gradients in the future at the same rate that they  
531 dispersed in the past. Instead, it is possible that species will disperse more quickly in the future,



532 especially if there is natural selection favoring individuals that disperse faster. If this is true, then  
533 more species may survive on these transects than suggested by our projections. However, almost  
534 half of the species included in our study (66%; 353 of 538) failed to disperse upwards at all  
535 between surveys, even though every species experienced climate change across their elevational  
536 range in these transects. Furthermore, many species actually contracted their ranges at their  
537 upper elevational limits (19%; 101 of 538). Thus, the majority of species did not disperse  
538 upwards over time. This suggests that it would be problematic to assume that most species will  
539 necessarily undertake more rapid upward dispersal at their cool edge in response to future  
540 climate change. We also note that in many cases the ability of species to shift their upper  
541 elevational ranges to reach cooler temperatures will be constrained by the limited heights of the  
542 mountains on which they occur. Thus, no matter how quickly they can move upwards, their  
543 ability to reach cooler temperatures will ultimately depend on there being cooler habitats that  
544 they can disperse to. Indeed, our analyses suggest that the limited availability of suitable climatic  
545 conditions on elevational transects might be important in driving projected extinctions by 2070,  
546 if species dispersed faster and reached mountaintops more quickly. Specifically, we compared  
547 the number of species predicted to persist when dispersal is not constrained by mountaintop  
548 height to the number projected to face extinction if dispersal is constrained (*SI Appendix*, Table  
549 S4; Dataset S6). Among the 45 upward-dispersing species projected to reach the highest  
550 elevation in their mountain range by 2070, we estimated that 90–99% will likely face extinction  
551 within their transect as consequence of limited mountaintop height (range based on RCP4.5 and  
552 RCP8.5, not assuming niche shifts; see *SI Appendix*, Table S4).

553 We also recognize that projected extinction of species on these elevational transects  
554 might not reflect the extinction of these species across their entire geographic range. On the one

555 hand, many species ranges might consist of similar elevational distributions across one or more  
556 additional mountain slopes, with similar properties to the slopes that were surveyed. In these  
557 cases, our projections might offer a reasonable proxy for the likelihood of global extinctions. On  
558 the other hand, various factors might increase the chances of species surviving in other parts of  
559 their geographic range (i.e. apart from the surveyed transect). These factors might include taller  
560 mountain ranges (allowing species to reach cooler habitats), steeper slopes (potentially allowing  
561 some species to disperse upwards more quickly), or distributions in other regions where  
562 extinction may be less likely (higher latitudes). Our estimates of extinction frequencies may still  
563 be conservative (i.e. underestimating extinction) because we do not include the potential effects  
564 of dramatically lower population sizes on long-term species survival (57).

565         Finally, we recognize that our study includes only terrestrial species on elevational  
566 gradients. Nevertheless, far more animal species are terrestrial than aquatic (58), even when  
567 including the large estimated numbers of undescribed marine species (59). Most plant species are  
568 also terrestrial (59). Moreover, many biodiversity hotspots are in montane regions, including the  
569 most diverse ones [i.e. the Tropical Andes (60)]. Freshwater species appear to be more sensitive  
570 to climate change than terrestrial or marine species, based on patterns of local extinction (1).  
571 Dispersal on latitudinal gradients may be slower than on elevational gradients (given that the  
572 absolute distances needed to reach lower temperatures may be greater), and may be more likely  
573 to be impeded by human habitat modification at low elevations. We have also included only  
574 some groups of organisms, with most sampled species being plants, insects, and birds (*SI*  
575 *Appendix*, Table S1; Dataset S1). These groups may not represent all species. However, most  
576 species depend on plants, either directly or indirectly. Furthermore, insects and birds may have

577 particularly high rates of dispersal (given that many or most have the ability to fly). Thus, other  
578 groups may be even less likely to avoid extinction by dispersal.

579

580 **Text S3. Alternative methods for summarizing climate at sites**

581 **Text S3.1. Overview**

582 The main results of our paper are based on the downscaled and EMD-transformed climatic data  
583 from CRU. For each site, an EMD model was fitted on the entire temporal range of CRU data  
584 coverage (1901–2013). Consequently, the extraction of climatic trends at each site under EMD  
585 accounts not only for climatic variation between surveys but also outside of these two dates. We  
586 acknowledge that other methods are currently available to extract temporal trends from climatic  
587 data (22–26). However, EMD has shown to be especially accurate for this purpose (21,27,28). In  
588 the sections below, we examine if our main conclusions are still supported when a window-based  
589 approach is used to summarize climate and climate change over time.

590

591 **Text S3.2. Methods used to construct alternative climatic datasets**

592 For each site, we estimated mean climatic conditions during the 5-year window and 10-year  
593 window preceding the date of each historical survey and recent resurvey. Based on the mean  
594 climatic values within these windows for each variable, we then estimated the change in climate  
595 between surveys and the rate of change in climate at each site between surveys. However, we  
596 used the actual times between surveys when estimating rates of change in climate (not the dates  
597 of the 5-year or 10-year windows). We acknowledge that the choice of 5 and 10 years for  
598 window sizes is arbitrary. However, we wanted to use time windows that spanned multiple years,  
599 in order to reduce stochastic differences in climate from year to year (therefore a window of 4  
600 years or less seemed too small). Using a larger window than 10 years also seemed problematic,  
601 given that this would approach the time between the historical and modern surveys (at least in  
602 some cases; see below).

603           The CRU temporal coverage starts in 1901. Therefore, it would be difficult to estimate 5-  
604 and 10-year windows for historical surveys close to this date. This was not problematic for most  
605 studies, in which the initial surveys were after 1911 (*SI Appendix*, Table S1). However, the initial  
606 survey in Felde et al. (7) was conducted in 1901. Given the limitations of the CRU dataset, we  
607 did not estimate 5- and 10-year windows for Felde et al. (7) and instead simply used the EMD-  
608 based estimates for 1901 (the oldest climatic record in our dataset).

609           Similarly, it would be problematic to calculate a 10-year window if the historical survey  
610 and modern resurvey were 10 or fewer years apart. This was not problematic for most studies,  
611 except for Raxworthy et al. (2), in which the surveys were only 10 years apart. For Raxworthy et  
612 al. (2), we described mean climate during the resurvey using a 5-year window only.

613           Mean climatic values for each site based on the 5-year and 10-year windows are  
614 compiled in Datasets S11 and S12, respectively. EMD-transformed climate data are summarized  
615 in Dataset S3. We compared climatic conditions between sites with and without local extinctions  
616 based on these three datasets (5-year window, 10-year window, and EMD). Specifically, we  
617 examined whether the three datasets agreed on the four main conclusions based on the resurvey  
618 data (not the conclusions based on future projections). These four main conclusions were as  
619 follows. (i) Based on Discriminant Analysis of Principal Components (DAPC), the most  
620 important climatic variable that distinguishes sites with and without local extinction is the  
621 change in maximum annual temperatures (Bio5). (ii) On average, mean annual temperatures at  
622 sites with local extinction changed less relative to sites without local extinctions. (iii) On  
623 average, maximum annual temperatures increased more and increased faster at sites with local  
624 extinction relative to those without. (iv) On average, annual precipitation and decreased more

625 and decreased faster between surveys at sites with local extinction. We compare these  
626 conclusions based on EMD to those based on 5-year and 10-year windows below.

627

628 **Text S3.3. Comparing main conclusions from climate data from EMD and window-based**  
629 **data**

630 Overall, results based on the three different climatic datasets (5-year window [Dataset S13], 10-  
631 year window [Dataset S14], and EMD [*SI Appendix*, Table S3]) generally agreed with each

632 regarding the main conclusions. The only exception was the variable selection for the 5-year

633 window. Variable selection based on DAPC was consistent between the EMD and 10-year

634 window datasets. These two datasets suggested that change in maximum annual temperatures

635 was the main driver of local extinctions between surveys (DAPC for the EMD dataset: *SI*

636 *Appendix*, Table S3; DAPC for the 10-year dataset: Dataset S14). Using a 5-year window, sites

637 with and without local extinction differed most strongly in the absolute change between surveys

638 in minimum annual temperatures (Bio6; Dataset S13). Specifically, minimum temperatures at

639 sites with local extinction increased less between surveys relative to other sites (mean absolute

640 change in Bio6, sites with local extinction=0.378°C vs sites without=2.264°C; Dataset S13).

641 However, these changes seem highly unlikely to explain local extinction at these sites (i.e. if

642 increases in this variable were important in driving local extinctions, then changes should be

643 larger at sites with local extinction, not those without). When analyzing rates of change, the 5-

644 year window dataset indicated that the most important variable was mean temperature during the

645 warmest quarter (Bio10; Dataset S13). Sites with local extinctions experienced faster increases in

646 mean warmest quarter temperatures (mean rate of change Bio10 for sites with local

647 extinction=0.008°C yr<sup>-1</sup> vs without=0.002°C yr<sup>-1</sup>; Dataset S13). This finding is more consistent

648 with those from EMD and the 10-year window, showing the importance of temperatures during  
 649 the hottest part of the year, and is inconsistent with the selection of minimum temperatures  
 650 (Bio6) for this same time 5-year time window. Overall, the differences in variable selection  
 651 between the 5-year window versus the 10-year window and EMD datasets suggest that the 5-year  
 652 window is more sensitive to stochastic variation in climate from year-to-year, consistent with the  
 653 smaller time window considered.

654 The three other main conclusions were all consistent between the data from EMD, the 10-  
 655 year window, and the 5-year window. Sites where local extinctions occurred tended to  
 656 experience smaller changes in mean annual temperatures (average change in mean annual  
 657 temperature, Bio1; EMD: sites with local extinction= $0.413^{\circ}\text{C}$  vs sites without= $1.174^{\circ}\text{C}$ , logistic  
 658 regressions between the change in Bio1 between surveys and the occurrence of local extinction:  
 659  $P < 0.001$ ; 10-year window: sites with local extinction= $0.579^{\circ}\text{C}$  vs sites without= $0.801^{\circ}\text{C}$ ,  
 660  $P = 0.043$ ; 5-year window: sites with local extinction= $0.552^{\circ}\text{C}$  vs sites without= $0.945^{\circ}\text{C}$ ,  
 661  $P = 0.027$ ).

662 Similarly, for all three datasets, sites with local extinction experienced larger increases in  
 663 maximum annual temperatures between surveys (mean absolute change in maximum annual  
 664 temperature, Bio5; EMD dataset: sites with local extinction= $0.413^{\circ}\text{C}$  vs sites without= $0.147^{\circ}\text{C}$ ,  
 665  $P < 0.001$ ; 10-year window: sites with local extinction= $0.400^{\circ}\text{C}$  vs sites without= $-1.515^{\circ}\text{C}$ ,  
 666  $P = 0.043$ ; 5-year window: local extinction= $0.464^{\circ}\text{C}$  vs sites without= $-0.840^{\circ}\text{C}$ ,  $P = 0.048$ ). Sites  
 667 with local extinction also experienced faster increases in maximum annual temperatures (mean  
 668 rate of change in maximum annual temperature, Bio5; EMD dataset: sites with local  
 669 extinction= $0.018^{\circ}\text{C yr}^{-1}$  vs sites without= $0.005^{\circ}\text{C yr}^{-1}$ ,  $P < 0.001$ ; 10-year window: sites with local

670 extinction= $0.008^{\circ}\text{C yr}^{-1}$  vs sites without= $-0.033^{\circ}\text{C yr}^{-1}$ ,  $P<0.001$ ; 5-year window: sites with local  
671 extinction= $0.008^{\circ}\text{C yr}^{-1}$  vs sites without= $-0.018^{\circ}\text{C yr}^{-1}$ ,  $P<0.001$ ).

672         Based on all three datasets, sites with local extinction became drier between surveys  
673 relative to sites without (mean absolute change in annual precipitation, Bio12: EMD dataset:  
674 sites with local extinction= $-29.029$  mm vs sites without= $80.008$  mm,  $P<0.001$ ; 10-year window:  
675 sites with local extinction= $7.587$  mm vs sites without= $117.597$  mm,  $P=0.006$ ; 5-year window:  
676 sites with local extinction= $-40.263$  mm vs sites without= $102.242$  mm,  $P=0.003$ ). Sites with local  
677 extinction also had faster rates of decrease in annual precipitation (mean rate of change in annual  
678 precipitation, Bio12: EMD dataset: sites with local extinction= $-1.130$  mm  $\text{yr}^{-1}$  vs sites  
679 without= $0.614$  mm  $\text{yr}^{-1}$ ,  $P<0.001$ ; 10-year window: sites with local extinction= $-0.242$  mm  $\text{yr}^{-1}$  vs  
680 sites without= $2.437$  mm  $\text{yr}^{-1}$ ,  $P<0.001$ ; 5-year window: sites with local extinction= $-0.973$  mm  $\text{yr}^{-1}$   
681 vs sites without= $1.673$  mm  $\text{yr}^{-1}$ ,  $P<0.001$ ).



682 **Text S4. Addressing the possible impacts of land-use change**

683 Changes in land use by humans over time might cause local extinctions that mimic the impacts  
684 of climate change. Some sites in the studies by Ploquin et al. (11) and Felde et al. (7) may have  
685 been impacted by land-use changes between the historical and modern surveys. However, this  
686 possibility was explicitly addressed in these papers, and therefore seems very unlikely (see Text  
687 S2). Nevertheless, we examined the impacts of excluding potentially affected sites in those two  
688 studies. We assumed that land-use change could cause sites to have local extinctions that were  
689 unrelated to climate change. Therefore, we excluded those sites with local extinctions in these  
690 two datasets. Specifically, we excluded the 9 sites with local extinction from Felde et al. (7) and  
691 76 sites with local extinction from Ploquin et al. (11). Thus, we excluded 85 sites from the full  
692 EMD dataset (sites in the original dataset=581; sites in the reduced dataset=496). Next, we  
693 compared climatic characteristics of sites with local extinction (sites with local extinction in the  
694 original dataset=148; sites with local extinction in the reduced dataset=63) and without local  
695 extinction (sites without local extinction in both the original and reduced datasets=433) in the  
696 reduced dataset (i.e. all sites except those with local extinction in Ploquin et al. [11] and Felde et  
697 al. [7]).

698 We found that the exclusion of these 85 sites had no effect on our main conclusions  
699 (Dataset S15). In line with our main conclusions, DAPC analyses based on the reduced dataset  
700 suggested that the absolute amount of change in maximum annual temperatures (and the rate of  
701 change in maximum annual temperatures) was the main driver of local extinctions across sites  
702 (Dataset S15). We also compared the climatic characteristics of sites with and without local  
703 extinction based on the reduced dataset. There were significantly larger changes in maximum  
704 annual temperatures between surveys at sites with local extinction relative to those without

705 (mean absolute change in Bio5, sites with local extinction=0.421°C vs sites without=0.146°C,  
706  $P<0.001$ , all based on logistic regression). The mean rate of change in maximum annual  
707 temperature was also faster at sites with local extinction (mean rate of change in Bio5, sites with  
708 local extinction=0.017°C yr<sup>-1</sup> vs sites without=0.004°C yr<sup>-1</sup>,  $P<0.001$ ). Sites with local extinction  
709 had smaller changes in mean annual temperature between surveys than those without local  
710 extinction (mean absolute change in mean Bio1, sites with local extinction=0.425°C vs sites  
711 without=1.173°C,  $P<0.001$ ). Finally, annual precipitation decreased more at sites with local  
712 extinctions (mean absolute change in Bio12, sites with local extinction=-56.853 mm vs sites  
713 without 80.008 mm,  $P<0.001$ ). Annual precipitation also decreased more rapidly at sites with  
714 local extinction (mean rate of change in Bio12, sites with local extinction=-1.571 mm yr<sup>-1</sup> vs  
715 sites without=0.614 mm yr<sup>-1</sup>,  $P<0.001$ ).

716 **REFERENCES**

- 717 1. Wiens JJ (2016) Climate-related local extinctions are already widespread among plant  
718 and animal species. *PLoS Biol* 14:e2001104.
- 719 2. Raxworthy CJ, et al. (2008) Extinction vulnerability of tropical montane endemism from  
720 warming and upslope displacement: a preliminary appraisal for the highest massif in  
721 Madagascar. *Glob Change Biol* 14:1703–1720.
- 722 3. Sheldon AL (2012) Possible climate-induced shift of stoneflies in a southern Appalachian  
723 catchment. *Freshw Sci* 31:765–774.
- 724 4. Warren RJ, Chick L (2013) Upward ant distribution shift corresponds with minimum, not  
725 maximum, temperature tolerance. *Glob Change Biol* 19:2082–2088.
- 726 5. Brusca RC, et al. (2013) Dramatic response to climate change in the Southwest: Robert  
727 Whittaker’s 1963 Arizona mountain plant transect revisited. *Ecol Evol* 3:3307–3319.
- 728 6. Chen IC, et al. (2011) Asymmetric boundary shifts of tropical montane Lepidoptera over  
729 four decades of climate warming. *Glob Ecol Biogeogr* 20:34–45.
- 730 7. Felde VA, Kapfer J, Grytnes J-A (2012) Upward shift in elevational plant species ranges  
731 in Sikkildalen, central Norway. *Ecography* 35:922–932.
- 732 8. Forero-Medina G, Terborgh J, Socolar SJ, Pimm SL (2011) Elevational ranges of birds  
733 on a tropical montane gradient lag behind warming temperatures. *PLoS One* 6:e28535.
- 734 9. Freeman BG, Freeman AMC (2014) Rapid upslope shifts in New Guinean birds illustrate  
735 strong distributional responses of tropical montane species to global warming. *Proc Natl*  
736 *Acad Sci USA* 111:4490–4494.
- 737 10. Menendez R, et al. (2006) Species richness changes lag behind climate change. *Proc Biol*  
738 *Soc* 273:1465–1470.

- 739 11. Ploquin EF, Herrera JM, Obeso JR (2013) Bumblebee community homogenization after  
740 uphill shifts in montane areas of northern Spain. *Oecologia* 173:1649–1660.
- 741 12. Harris I, Jones P, Osborn T, Lister D (2013) Updated high-resolution grids of monthly  
742 climatic observations - the CRU TS3.10 Dataset. *Int J Climatol* 34:623–642.
- 743 13. Hijmans RJ, Cameron SE, Parra JL, Jones PG, Jarvis A (2005) Very high resolution  
744 interpolated climate surfaces for global land areas. *Int J Climatol* 25:1965–1978.
- 745 14. Fick SE, Hijmans RJ (2017) WorldClim 2: new 1-km spatial resolution climate surfaces  
746 for global land areas. *Int J Climatol* 37:4302–4315.
- 747 15. R Core Team (2016) R: A language and environment for statistical computing (R  
748 Foundation for Statistical Computing, Vienna).
- 749 16. Zang C (2017) tusk: Conveniently access gridded climate data sets. R package version  
750 0.99.
- 751 17. Babst F, et al. (2012) Site- and species-specific responses of forest growth to climate  
752 across the European continent. *Glob Ecol Biogeogr* 22:706–717.
- 753 18. Canestrelli D, et al. (2017) Climate change promotes hybridisation between deeply  
754 divergent species. *PeerJ* 5:e3072.
- 755 19. Kalnay EM, et al. (1996) The NCEP/NCAR 40-year reanalysis project. *Bull Am Meteorol*  
756 *Soc* 77:437–471.
- 757 20. Kim D, Oh HS (2009) EMD: a package for empirical mode decomposition and Hilbert  
758 spectrum. *R J* 1:40–46.
- 759 21. Wu Z, Huang NE, Long SR, Peng C-K (2007) On the trend, detrending, and variability of  
760 nonlinear and nonstationary time series. *Proc Natl Acad Sci USA* 104:14889–14894.
- 761 22. Mudelsee M (2009) Break function regression. *Eur Phys J* 174:49–63.

- 762 23. Mudelsee M (2018) Trend analysis of climate time series: A review of methods. *Earth-*  
763 *Sci Rev* 190:310–322.
- 764 24. Mohorji AM, Şen Z, Almazroui M (2017) Trend analyses revision and global monthly  
765 temperature innovative multi-duration analysis. *Earth Sys Env*1:9.
- 766 25. Perry AL, Low PJ, Ellis JR, Reynolds JD (2005) Climate change and distribution shifts in  
767 marine fishes. *Science* 308:1912–1915.
- 768 26. Thoning KW, Tans PP, Komhyr WD (1989) Atmospheric carbon dioxide at Mauna Loa  
769 Observatory: 2. Analysis of the NOAA GMCC data, 1974–1985. *J Geophys*  
770 *Res* 94:8549–8565.
- 771 27. Huang NE, et al. (1998) The empirical mode decomposition and the Hilbert spectrum for  
772 nonlinear and non-stationary time series analysis. *Proc R Soc Lond A* 454:903–995.
- 773 28. Huang NE, Wu M-LC, Long SR, Shen SS-P, Qu W, Gloersen P, Fan KL (2003) A  
774 confidence limit for the empirical mode decomposition and Hilbert spectral analysis.  
775 *Proc R Soc Lond A* 459:2317–2345.
- 776 29. Franzke CLE (2010) Long-range dependence and climate noise characteristics of  
777 Antarctic temperature data. *J Clim* 23:6074–6081.
- 778 30. Franzke CLE (2012) Nonlinear trends, long-range dependence, and climate noise  
779 properties of surface temperature. *J Clim* 25:4172–4183.
- 780 31. Franzke CLE (2014) Warming trends: nonlinear climate change. *Nat Clim Change* 4:423.
- 781 32. O’Donnell MS, Ignizio DA (2012) Bioclimatic predictors for supporting ecological  
782 applications in the conterminous United States (U.S. Geological Survey Data Series, Fort  
783 Collins).

- 784 33. Booth TH, Nix HA, Busby JR, Hutchinson MF (2013) Bioclim: the first species  
785 distribution modelling package, its early applications and relevance to most current  
786 MaxEnt studies. *Divers Distrib* 20:1–9.
- 787 34. Jombart T (2008) adegenet: a R package for the multivariate analysis of genetic markers.  
788 *Bioinformatics* 24:1403–1405.
- 789 35. Jombart T, Collins C (2015) *A tutorial for discriminant analysis of principal components*  
790 *(DAPC) using adegenet 2.0.0* (Imperial College London, MRC Centre for Outbreak  
791 Analysis and Modelling, London).
- 792 36. Grömping U (2006) Relative importance for linear regression in R: the package relaimpo.  
793 *J Stat Softw* 17.
- 794 37. Lindeman RH, Merenda PF, Gold RZ (1980) *Introduction to bivariate and multivariate*  
795 *analysis* (Scott, Foresman and Comp, Glenview).
- 796 38. LeBreton JM (2004) History and use of relative importance indices in organizational  
797 research. *Organ Res Methods* 7:238–257.
- 798 39. Ye T, Wang Y, Guo Z, Li Y (2017) Factor contribution to fire occurrence, size, and burn  
799 probability in a subtropical coniferous forest in East China. *PLoS One* 12:e0172110.
- 800 40. Warren R, et al. (2013) Quantifying the benefit of early climate change mitigation in  
801 avoiding biodiversity loss. *Nat Clim Change* 3:678–682.
- 802 41. Warren R, Price J, Graham E, Forstenhaeusler N, Vanderwal J (2018) The projected  
803 effect on insects, vertebrates, and plants of limiting global warming to 1.5°C rather than  
804 2°C. *Science* 360:791–795.

- 805 42. Goberville E, Beaugrand G, Hautekèete N-C, Piquot Y, Luczak C (2015) Uncertainties in  
806 the projection of species distributions related to general circulation models. *Ecol Evol*  
807 5:1100–1116.
- 808 43. Makino A, et al. (2014) The effect of applying alternate IPCC climate scenarios to marine  
809 reserve design for range changing species. *Conserv Lett* 8:320–328.
- 810 44. García Molinos J, et al. (2015) Climate velocity and the future global redistribution of  
811 marine biodiversity. *Nat Clim Change* 6:83–88.
- 812 45. IPCC (2013) *Climate Change 2013: The physical science basis*. (Cambridge Univ. Press,  
813 New York).
- 814 46. Raftery AE, Zimmer A, Frierson DM, Startz R, Liu P (2017) Less than 2°C warming by  
815 2100 unlikely. *Nat Clim Change* 7:637–641.
- 816 47. Christensen P, Gillingham K, Nordhaus W (2018) Uncertainty in forecasts of long-run  
817 economic growth. *Proc Natl Acad Sci USA* 115:5409–5414.
- 818 48. Rogelj J, et al. (2018) Scenarios towards limiting global mean temperature increase  
819 below 1.5°C. *Nat Clim Change* 8:325–332.
- 820 49. Vuuren DPV, et al. (2011) RCP2.6: Exploring the possibility to keep global mean  
821 temperature increase below 2°C. *Clim Change* 109:95–116.
- 822 50. Freeman BG, Scholer MN, Ruiz-Gutierrez V, Fitzpatrick JW (2018) Climate change  
823 causes upslope shifts and mountaintop extirpations in a tropical bird community. *Proc*  
824 *Natl Acad Sci USA*:115:11982–11987.
- 825 51. Venables WN, Ripley BD (2002) *Modern applied statistics with S* (Springer, New York)
- 826 52. Cahill AE, et al. (2013) How does climate change cause extinction? *Proc Biol Sci*  
827 280:20121890.

- 828 53. Hatcher L, Stepanski EJ (2011) *A step-by-step approach to using the SAS system for*  
829 *univariate and multivariate statistics* (SAS Institute, Cary).
- 830 54. Hutcheson GD, Sofroniou N (2006) *The multivariate social scientist: introductory*  
831 *statistics using generalized linear models* (Sage, Thousand Oaks).
- 832 55. MacCallum RC, Widaman KF, Preacher KJ, Hong S (2001) Sample size in factor  
833 analysis: the role of model error. *Multivar Behav Res* 36:611–637.
- 834 56. Comrey AL, Lee HB (2016) *A first course in factor analysis* (Hillsdale, New York).
- 835 57. Morris WF, Doak DF (2002) *Quantitative conservation biology: theory and practice of*  
836 *population viability analysis* (Sinauer Associates, Sunderland).
- 837 58. Wiens JJ (2015) Faster diversification on land than sea helps explain global biodiversity  
838 patterns among habitats and animal phyla. *Ecol Lett* 18:1234–1241.
- 839 59. Mora C, Tittensor DP, Adl S, Simpson AG, Worm B (2011) How many species are there  
840 on Earth and in the ocean? *PLoS Biol* 9:e1001127.
- 841 60. Myers N, Mittermeier RA, Mittermeier CG, Da Fonseca GA, Kent J (2000) Biodiversity  
842 hotspots for conservation priorities. *Nature* 403:853.



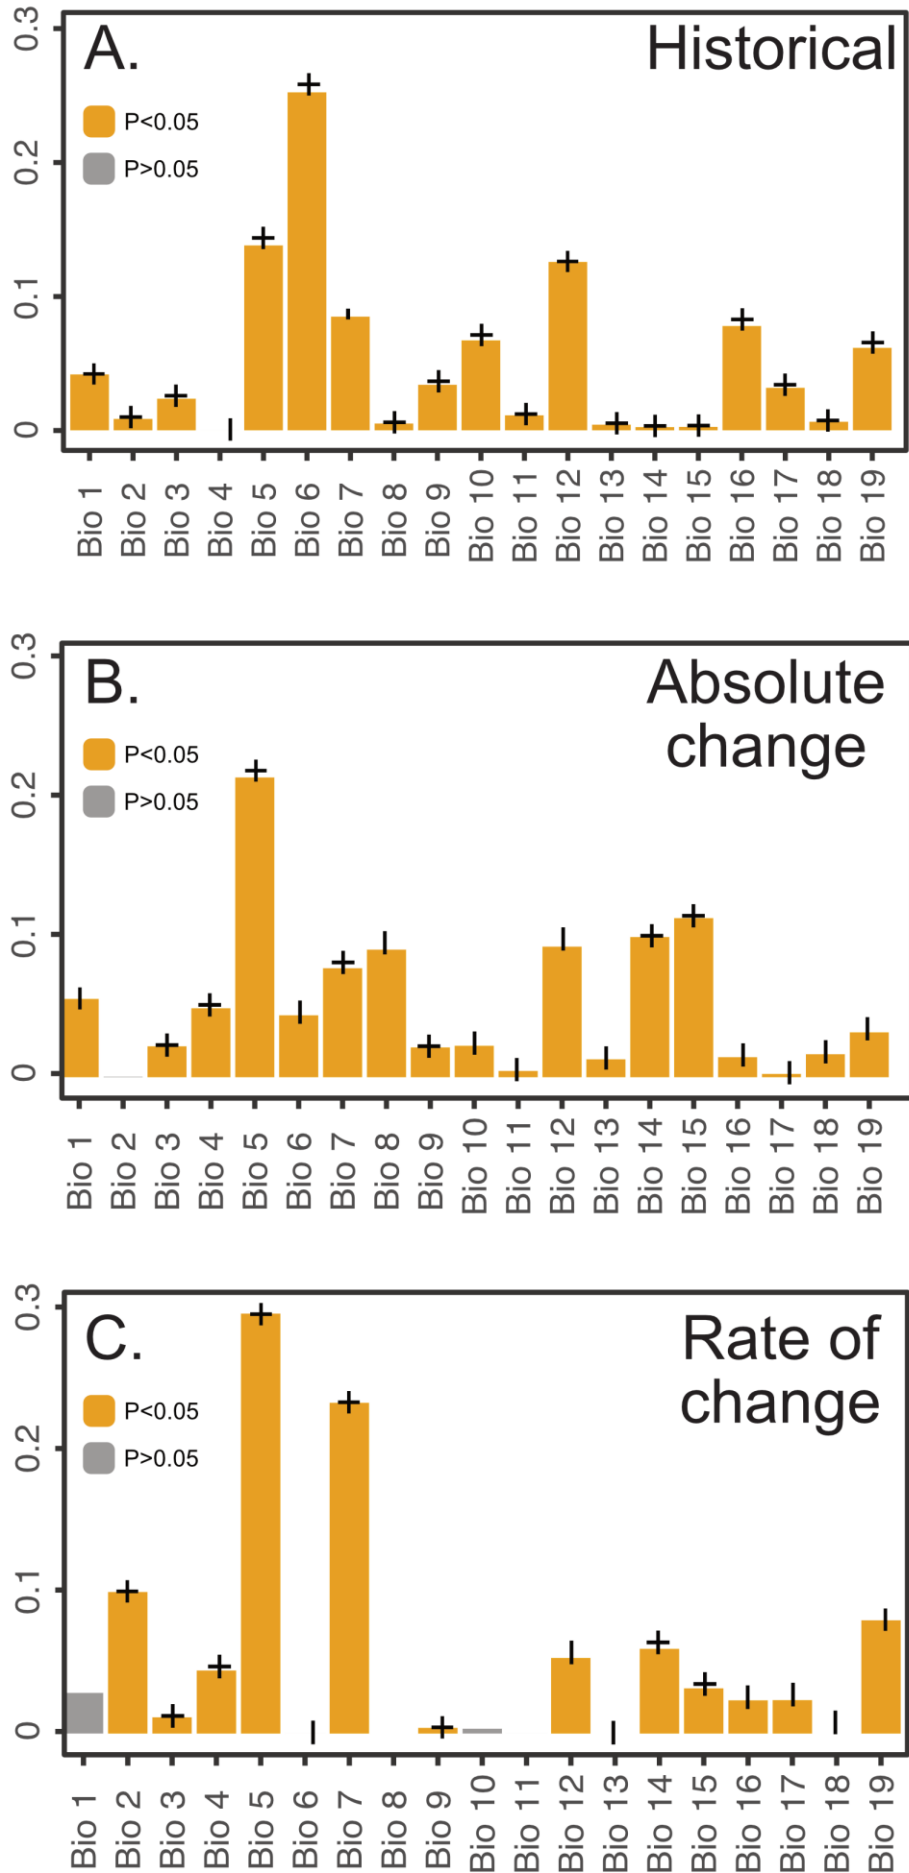

**Fig. S1.** Contributions of different variables to climatic differences between sites with and without local extinction. We present results for the (A) historical climate, and both the (B) absolute change, and (C) rate of change in climatic variables between surveys. DAPC loadings (Y axis) are shown for each Bioclim variable during the initial survey. Results for (A) address

how climatic variation among sites at the same time period (before major warming) predicted which sites showed local extinctions in the subsequent resurvey. Historically warmer sites (i.e. higher values of minimum annual temperatures, Bio6) were more likely to contain species that underwent local extinction between surveys (A). Sites in which local extinctions occurred were most distinct from those without in having greater increases in maximum annual temperatures (Bio5) between surveys (B) and a faster rate of change in this variable (C). We also show odds ratios and *P*-values for univariate logistic regressions between climatic descriptors and occurrence of local extinction across sites. Odds ratios larger than 1 (indicated with “+”) suggest that increases in predictor variables are associated with a higher likelihood of local extinction. Conversely, if odds ratios are smaller than 1 (indicated with a vertical line “|”), the likelihood of local extinction is inversely related to increases in predictor variables. Definitions of Bioclim variables are given in *SI Appendix*, Table S2.

## Supplementary Tables

**Table S1.** Summary information for the analyzed datasets. Columns are labeled as follows. Study: original paper from which the data were obtained. Sites: number of specific locations surveyed and resurveyed on each transect. Species: total number of species found on the transect. Local extinction (species): proportion of the total sampled species that had local extinctions at one or more sites on the transect. Local extinction (sites): proportion of the total sampled sites where at least one species had a local extinction between surveys. Survey date: year when the initial survey was conducted. Resurvey date: year when the resurvey of the transect was conducted. Taxonomic group: higher taxon to which the sampled species belong. Continent: general location of the transect. Lists of species for each transect (and the sites at which they were found in the survey and resurvey) are given in Dataset S1. Geographic coordinates used for each site are given in Dataset S2.

| Study                           | Sites | Species | Local extinction (species) | Local extinction (sites) | Survey date | Resurvey date | Taxonomic group | Continent     |
|---------------------------------|-------|---------|----------------------------|--------------------------|-------------|---------------|-----------------|---------------|
| Brusca <i>et al.</i> (5)        | 8     | 27      | 0.5556                     | 1.0000                   | 1963        | 2011          | Plants          | North America |
| Chen <i>et al.</i> (6)          | 10    | 208     | 0.5577                     | 1.0000                   | 1965        | 2007          | Insects         | Asia          |
| Felde <i>et al.</i> (7)         | 315   | 105     | 0.0857                     | 0.0285                   | 1900        | 2008          | Plants          | Europe        |
| Forero-Medina <i>et al.</i> (8) | 5     | 55      | 0.2909                     | 0.8000                   | 1969        | 2010          | Birds           | South America |

---

|                             |     |    |        |        |                         |           |               |               |
|-----------------------------|-----|----|--------|--------|-------------------------|-----------|---------------|---------------|
| Freeman and Freeman (9)     | 37  | 54 | 0.7407 | 0.6216 | 1965                    | 2012      | Birds         | Oceania       |
| Menendez <i>et al.</i> (10) | 40  | 39 | 0.5385 | 0.4250 | 1981–1982;<br>1992–1993 | 2006–2007 | Insects       | Europe        |
| Ploquin <i>et al.</i> (11)  | 119 | 16 | 0.6875 | 0.6386 | 1988–1989               | 2009      | Insects       | Europe        |
| Raxworthy <i>et al.</i> (2) | 3   | 30 | 0.3667 | 0.3333 | 1993                    | 2003      | Frogs/Lizards | Madagascar    |
| Sheldon (3)                 | 31  | 2  | 0.0000 | 0.0000 | 1977–1978               | 2006      | Insects       | North America |
| Warren and Chick (4)        | 13  | 2  | 0.0000 | 0.0000 | 1973–1974               | 2012      | Insects       | North America |

---

**Table S2.** Definitions for Bioclim variables (32).

| Code  | Description                                                |
|-------|------------------------------------------------------------|
| Bio1  | Annual mean temperature                                    |
| Bio2  | Mean diurnal range (mean of monthly (max temp - min temp)) |
| Bio3  | Isothermality ( $100 \cdot \text{Bio2} / \text{Bio7}$ )    |
| Bio4  | Temperature seasonality                                    |
| Bio5  | Maximum temperature of warmest month                       |
| Bio6  | Minimum temperature of coldest month                       |
| Bio7  | Temperature annual range ( $\text{Bio5} - \text{Bio6}$ )   |
| Bio8  | Mean temperature of wettest quarter                        |
| Bio9  | Mean temperature of driest quarter                         |
| Bio10 | Mean temperature of warmest quarter                        |
| Bio11 | Mean temperature of coldest quarter                        |
| Bio12 | Annual precipitation                                       |
| Bio13 | Precipitation of wettest month                             |
| Bio14 | Precipitation of driest month                              |
| Bio15 | Precipitation seasonality (coefficient of variation)       |
| Bio16 | Precipitation of wettest quarter                           |
| Bio17 | Precipitation of driest quarter                            |
| Bio18 | Precipitation of warmest quarter                           |
| Bio19 | Precipitation of coldest quarter                           |

**Table S3.** Summary of statistical results comparing climatic variables at sites with and without local extinction. For each climatic variable, we present both the mean and standard deviation for sites with and without local extinction (sites are considered as having local extinction if any of the species surveyed had a local extinction at that site, as indicated by failure to find that species at that site during the resurvey). Next, we show results for univariate logistic regressions between each climatic variable and the occurrence of local extinction. We then summarize odds and *P*-values for each of the models. We also performed DAPC analyses between the occurrence of local extinction across sites and all climatic variables. These analyses were fit independently for variables for historical climate (i.e. climate for the year of the initial survey), absolute change in climate (historical – modern values), and rate of change in climate (absolute change/time between surveys). We refer to each climatic variable with the prefix “historical”, “absolute.change” and “rate.change” and we present the results for these three sets of variables in that order. We show DAPC loadings (LD1 loading) for each of these variables within each of the three analyzed datasets. Bioclim variables are defined in *SI Appendix*, Table S2. Given that some odds were very large, we summarize odds greater than nine as “>9”.

| Variable             | Descriptive statistics |         |                  |         | Univariate logistic regression |          | DAPC        |
|----------------------|------------------------|---------|------------------|---------|--------------------------------|----------|-------------|
|                      | No local extinction    |         | Local extinction |         | Odds                           | <i>P</i> | LD1 loading |
|                      | Mean                   | SD      | Mean             | SD      |                                |          |             |
| historical.Bio1      | 1.530                  | 6.080   | 11.600           | 5.410   | 1.250                          | <0.001   | 0.039       |
| historical.Bio2      | 8.770                  | 1.900   | 9.710            | 1.830   | 1.260                          | <0.001   | 0.009       |
| historical.Bio3      | 30.800                 | 11.500  | 48.500           | 19.700  | 1.070                          | <0.001   | 0.023       |
| historical.Bio4      | 7.110                  | 1.490   | 4.310            | 2.300   | 0.508                          | <0.001   | 0.000       |
| historical.Bio5      | 17.800                 | 5.050   | 23.900           | 3.860   | 1.250                          | <0.001   | 0.129       |
| historical.Bio6      | -12.700                | 7.130   | 1.330            | 7.680   | 1.210                          | <0.001   | 0.275       |
| historical.Bio7      | 30.100                 | 4.240   | 22.500           | 7.000   | 0.804                          | <0.001   | 0.091       |
| historical.Bio8      | 6.090                  | 3.640   | 11.000           | 5.560   | 1.250                          | <0.001   | 0.006       |
| historical.Bio9      | 0.271                  | 7.960   | 13.500           | 5.620   | 1.230                          | <0.001   | 0.035       |
| historical.Bio10     | 10.500                 | 4.920   | 17.100           | 3.680   | 1.280                          | <0.001   | 0.069       |
| historical.Bio11     | -6.630                 | 7.180   | 6.680            | 7.570   | 1.210                          | <0.001   | 0.011       |
| historical.Bio12     | 929.000                | 526.000 | 1350.000         | 941.000 | 1.000                          | <0.001   | 0.128       |
| historical.Bio13     | 159.000                | 69.200  | 225.000          | 115.000 | 1.010                          | <0.001   | 0.005       |
| historical.Bio14     | 29.300                 | 21.200  | 36.100           | 41.900  | 1.010                          | 0.012    | 0.003       |
| historical.Bio15     | 53.400                 | 8.550   | 59.100           | 16.200  | 1.050                          | <0.001   | 0.003       |
| historical.Bio16     | 339.000                | 175.000 | 506.000          | 292.000 | 1.000                          | <0.001   | 0.077       |
| historical.Bio17     | 139.000                | 98.900  | 186.000          | 182.000 | 1.000                          | <0.001   | 0.035       |
| historical.Bio18     | 259.000                | 141.000 | 301.000          | 279.000 | 1.000                          | 0.018    | 0.006       |
| historical.Bio19     | 214.000                | 126.000 | 333.000          | 190.000 | 1.010                          | <0.001   | 0.060       |
| absolute.change.Bio1 | 1.170                  | 0.516   | 0.413            | 0.367   | 0.060                          | <0.001   | 0.057       |
| absolute.change.Bio2 | 0.061                  | 0.348   | 0.056            | 0.214   | 0.951                          | 0.864    | 0.001       |
| absolute.change.Bio3 | -0.003                 | 0.749   | 0.428            | 1.380   | 1.550                          | <0.001   | 0.023       |
| absolute.change.Bio4 | -0.065                 | 0.070   | 0.011            | 0.106   | >9                             | <0.001   | 0.050       |

| Variable              | Descriptive statistics |        |                  |         | Univariate logistic regression |          | DAPC           |
|-----------------------|------------------------|--------|------------------|---------|--------------------------------|----------|----------------|
|                       | No local extinction    |        | Local extinction |         | Odds                           | <i>P</i> | LD1<br>loading |
|                       | Mean                   | SD     | Mean             | SD      |                                |          |                |
| absolute.change.Bio5  | 0.147                  | 0.205  | 0.413            | 0.299   | >9                             | <0.001   | 0.216          |
| absolute.change.Bio6  | 1.210                  | 1.210  | 0.231            | 0.505   | 0.111                          | <0.001   | 0.045          |
| absolute.change.Bio7  | -0.763                 | 0.729  | 0.264            | 0.709   | 5.240                          | <0.001   | 0.079          |
| absolute.change.Bio8  | 1.040                  | 1.800  | 0.311            | 0.866   | 0.757                          | <0.001   | 0.092          |
| absolute.change.Bio9  | -0.563                 | 1.560  | 0.190            | 1.040   | 1.420                          | <0.001   | 0.022          |
| absolute.change.Bio10 | 1.050                  | 0.420  | 0.445            | 0.456   | 0.071                          | <0.001   | 0.023          |
| absolute.change.Bio11 | 0.373                  | 0.294  | 0.205            | 0.199   | 0.050                          | <0.001   | 0.005          |
| absolute.change.Bio12 | 80.000                 | 83.000 | -29.000          | 102.000 | 0.988                          | <0.001   | 0.094          |
| absolute.change.Bio13 | -2.290                 | 10.900 | -8.880           | 20.700  | 0.966                          | <0.001   | 0.013          |
| absolute.change.Bio14 | 6.520                  | 11.900 | 13.000           | 30.300  | 1.020                          | 0.001    | 0.101          |
| absolute.change.Bio15 | -7.780                 | 4.560  | -0.845           | 4.600   | 1.320                          | <0.001   | 0.115          |
| absolute.change.Bio16 | 16.100                 | 25.200 | 1.260            | 40.100  | 0.980                          | <0.001   | 0.015          |
| absolute.change.Bio17 | 7.440                  | 19.000 | -1.180           | 27.600  | 0.981                          | <0.001   | 0.003          |
| absolute.change.Bio18 | 28.500                 | 26.400 | 9.870            | 53.600  | 0.984                          | <0.001   | 0.017          |
| absolute.change.Bio19 | 8.980                  | 22.700 | -10.900          | 34.300  | 0.970                          | <0.001   | 0.033          |
| rate.change.Bio1      | 0.015                  | 0.005  | 0.013            | 0.009   | 0.000                          | 0.077    | 0.029          |
| rate.change.Bio2      | -0.001                 | 0.011  | 0.003            | 0.007   | >9                             | <0.001   | 0.100          |
| rate.change.Bio3      | 0.003                  | 0.020  | 0.015            | 0.042   | >9                             | <0.001   | 0.012          |
| rate.change.Bio4      | -0.001                 | 0.002  | 0.001            | 0.004   | >9                             | <0.001   | 0.045          |
| rate.change.Bio5      | 0.005                  | 0.012  | 0.018            | 0.017   | >9                             | <0.001   | 0.297          |
| rate.change.Bio6      | 0.015                  | 0.017  | 0.006            | 0.011   | 0.000                          | <0.001   | 0.000          |
| rate.change.Bio7      | -0.008                 | 0.025  | 0.017            | 0.028   | >9                             | <0.001   | 0.234          |
| rate.change.Bio8      | 0.015                  | 0.029  | 0.014            | 0.029   | 0.565                          | 0.861    | 0.000          |
| rate.change.Bio9      | 0.003                  | 0.037  | 0.013            | 0.039   | >9                             | 0.008    | 0.004          |
| rate.change.Bio10     | 0.014                  | 0.007  | 0.015            | 0.011   | >9                             | 0.105    | 0.004          |
| rate.change.Bio11     | 0.007                  | 0.008  | 0.007            | 0.007   | >9                             | 0.747    | 0.000          |
| rate.change.Bio12     | 0.614                  | 1.830  | -1.130           | 2.500   | 0.695                          | <0.001   | 0.054          |
| rate.change.Bio13     | -0.100                 | 0.333  | -0.415           | 0.640   | 0.214                          | <0.001   | 0.000          |
| rate.change.Bio14     | 0.088                  | 0.259  | 0.295            | 0.643   | 2.990                          | <0.001   | 0.060          |
| rate.change.Bio15     | -0.082                 | 0.070  | -0.018           | 0.131   | >9                             | <0.001   | 0.032          |
| rate.change.Bio16     | 0.102                  | 0.503  | -0.142           | 1.130   | 0.608                          | <0.001   | 0.024          |
| rate.change.Bio17     | -0.043                 | 0.461  | -0.150           | 0.658   | 0.669                          | 0.032    | 0.024          |
| rate.change.Bio18     | 0.238                  | 0.692  | -0.031           | 1.300   | 0.703                          | 0.002    | 0.000          |
| rate.change.Bio19     | 0.003                  | 0.890  | -0.588           | 1.080   | 0.518                          | <0.001   | 0.080          |

**Table S4.** Summary of the proportion of species vulnerable to extinction from climate change (without dispersal or niche shifts). For each combination of RCP and available GCM, we estimate the number of species projected to have their current distributions (on their transect) outside of their current range of values for maximum annual temperature by 2070. These species are vulnerable to extinction from climate change, unless they undergo dispersal or niche shifts. The number of these species is then divided by the total number of species in our dataset ( $n=538$ ) to estimate the proportion of species vulnerable to extinction (without dispersal or niche shifts). We also summarize the distance to the current thermal niche (for maximum annual temperature) as the mean across all species for each combination of RCP and GCM. This distance is the difference between the projected value for maximum annual temperature in 2070 at the coolest site in the species' current range (usually the highest elevation site) and the current maximum value of maximum annual temperature within the species current range (at the time of the resurvey). The species-level data on which this summary is based are presented in Dataset S5.

| RCP | GCM | Proportion species outside current niche | Distance to current niche |
|-----|-----|------------------------------------------|---------------------------|
| 2.6 | BC  | 0.703                                    | 0.536                     |
| 2.6 | CC  | 0.704                                    | 0.529                     |
| 2.6 | CN  | 0.695                                    | 0.545                     |
| 2.6 | GD  | 0.539                                    | 0.550                     |
| 2.6 | GF  | 0.829                                    | 2.243                     |
| 2.6 | GS  | 0.604                                    | 0.473                     |
| 2.6 | HD  | 0.511                                    | 0.941                     |



---

|     |    |       |       |
|-----|----|-------|-------|
| 2.6 | HE | 0.770 | 1.032 |
| 2.6 | IP | 0.708 | 1.198 |
| 2.6 | MC | 0.742 | 1.041 |
| 2.6 | MG | 0.636 | 0.498 |
| 2.6 | MI | 0.855 | 1.440 |
| 2.6 | MP | 0.641 | 0.821 |
| 2.6 | MR | 0.807 | 1.760 |
| 2.6 | NO | 0.727 | 0.593 |
|     |    |       |       |
| 4.5 | AC | 0.745 | 1.765 |
| 4.5 | BC | 0.710 | 1.032 |
| 4.5 | CC | 0.734 | 1.217 |
| 4.5 | CE | 0.875 | 2.820 |
| 4.5 | CN | 0.779 | 1.082 |
| 4.5 | GD | 0.714 | 1.095 |
| 4.5 | GF | 0.890 | 2.995 |
| 4.5 | GS | 0.714 | 1.022 |
| 4.5 | HD | 0.799 | 1.959 |
| 4.5 | HE | 0.842 | 1.761 |
| 4.5 | HG | 0.792 | 1.606 |
| 4.5 | IN | 0.667 | 0.437 |
| 4.5 | IP | 0.779 | 1.932 |
| 4.5 | MC | 0.822 | 1.574 |

---

---

|     |    |       |       |
|-----|----|-------|-------|
| 4.5 | MG | 0.664 | 0.999 |
| 4.5 | MI | 0.922 | 2.018 |
| 4.5 | MP | 0.697 | 1.561 |
| 4.5 | MR | 0.901 | 2.074 |
| 4.5 | NO | 0.762 | 1.251 |
| 6   | BC | 0.732 | 1.248 |
| 6   | CC | 0.738 | 1.319 |
| 6   | GD | 0.730 | 1.205 |
| 6   | GS | 0.725 | 1.136 |
| 6   | HD | 0.801 | 1.522 |
| 6   | HE | 0.879 | 1.880 |
| 6   | IP | 0.781 | 1.962 |
| 6   | MC | 0.768 | 1.639 |
| 6   | MG | 0.680 | 1.253 |
| 6   | MI | 0.929 | 2.266 |
| 6   | MR | 0.870 | 2.108 |
| 6   | NO | 0.749 | 1.215 |
| 8.5 | AC | 0.868 | 2.688 |
| 8.5 | BC | 0.762 | 2.064 |
| 8.5 | CC | 0.835 | 2.250 |
| 8.5 | CN | 0.851 | 1.777 |

---

---

|     |    |       |       |
|-----|----|-------|-------|
| 8.5 | GF | 0.948 | 4.325 |
| 8.5 | GS | 0.805 | 1.710 |
| 8.5 | HD | 0.928 | 2.601 |
| 8.5 | HE | 0.941 | 3.151 |
| 8.5 | HG | 0.931 | 2.987 |
| 8.5 | IN | 0.684 | 1.374 |
| 8.5 | IP | 0.894 | 3.223 |
| 8.5 | MC | 0.892 | 2.342 |
| 8.5 | MG | 0.770 | 2.092 |
| 8.5 | MI | 0.950 | 3.529 |
| 8.5 | MP | 0.777 | 2.852 |
| 8.5 | MR | 0.950 | 3.621 |
| 8.5 | NO | 0.866 | 2.033 |

---

**Table S5.** Mean distances and rates of elevational dispersal at species' upper elevational range limits. Many species moved upwards in elevation between surveys ( $n=185$ ), and for these species we calculated the absolute amount (in meters above sea level) that their upper elevational limit increased between surveys. A large number of species ( $n=101$ ) moved downwards at their upper elevational ranges over time instead (presumably due to local extinctions at upper sites). For these species, we calculated the decrease in the elevation of their upper ranges as the amount of dispersal, and this value divided by the time between surveys yields the downward dispersal rate (although this presumably reflects local extinction rather than movement of individuals). Note that 47% of the analyzed species ( $n=252$ ) did not disperse between surveys at their upper elevational range limits. Species-level data are provided in Dataset S6.

| Species             | $n$ | Dispersal amount        | Dispersal rate            |
|---------------------|-----|-------------------------|---------------------------|
| Upward dispersing   | 185 | 312.872 m (SD=246.242)  | 9.899 m/year (SD=10.868)  |
| Downward dispersing | 101 | -241.810 m (SD=413.607) | -3.965 m/year (SD=20.035) |

**Table S6.** Summary statistics for univariate regressions testing the relationship between maximum annual temperatures (Bio5) and elevation across sites. We fit separate regression models for each transect. We also summarize here the elevation at the highest sampled site on the transect, and the highest elevation on the mountain on which the transect is located.

| Study                           | Maximum elevation along<br>the transect | Mountain<br>summit | $r^2$ | $P$       | Slope     |
|---------------------------------|-----------------------------------------|--------------------|-------|-----------|-----------|
| Brusca <i>et al.</i> (5)        | 2743                                    | 2791               | 0.992 | 1.66E-07  | -7.18E-03 |
| Chen <i>et al.</i> (6)          | 3675                                    | 4021               | 0.948 | 2.07E-06  | -4.38E-03 |
| Felde <i>et al.</i> (7)         | 1610                                    | 2292               | 0.841 | 5.72E-127 | -6.24E-03 |
| Forero-Medina <i>et al.</i> (8) | 2220                                    | 2274               | 0.989 | 4.92E-04  | -2.92E-03 |
| Freeman and Freeman (9)         | 2382                                    | 2423               | 0.763 | 1.76E-12  | -4.10E-03 |
| Menendez <i>et al.</i> (10)     | 2518                                    | 3322               | 0.198 | 4.05E-03  | -4.40E-03 |
| Ploquin <i>et al.</i> (11)      | 2306                                    | 2549               | 0.724 | 1.66E-34  | -2.18E-03 |
| Raxworthy <i>et al.</i> (2)     | 2500                                    | 2774               | 0.982 | 8.54E-02  | -5.18E-03 |
| Sheldon (3)                     | 1113                                    | 1929               | 0.967 | 3.95E-23  | -6.58E-03 |
| Warren and Chick (4)            | 1052                                    | 1565               | 0.958 | 6.14E-09  | -5.24E-03 |

**Table S7.** Estimated level of extinction assuming that upward-dispersing species respond to climate change only by dispersing. We include only species that dispersed upwards (at their upper elevational range limits) between surveys ( $n=185$ ). We show estimates for the proportion of these 185 species that are projected to go extinct by 2070, for two alternative dispersal scenarios. The unconstrained scenario assumes that upward dispersal is not restricted by the height of the mountain range on which the survey was undertaken. The constrained scenario assumes that species can only disperse until they reach the highest elevation possible on the mountain range containing their elevational transect (i.e. the top of the mountain range). Results are shown for multiple climatic scenarios based on the 12–19 available GCMs for each of the four RCPs. We present results for two different RCPs in the main text: RCP4.5 and RCP8.5. For each of these two RCPs, we simply averaged the extinction frequencies across all nested GCMs. Not all combinations of GCMs and RCPs are available. The species-level data are presented in Dataset S6, along with model abbreviations.

| RCP | GCM | Extinction frequency<br>(Unconstrained) | Extinction frequency<br>(Constrained) |
|-----|-----|-----------------------------------------|---------------------------------------|
| 2.6 | BC  | 0.135                                   | 0.168                                 |
| 2.6 | CC  | 0.130                                   | 0.157                                 |
| 2.6 | CN  | 0.151                                   | 0.178                                 |
| 2.6 | GD  | 0.092                                   | 0.124                                 |
| 2.6 | GF  | 0.330                                   | 0.384                                 |
| 2.6 | GS  | 0.097                                   | 0.135                                 |
| 2.6 | HD  | 0.168                                   | 0.205                                 |

---

|     |    |       |       |
|-----|----|-------|-------|
| 2.6 | HE | 0.222 | 0.308 |
| 2.6 | IP | 0.232 | 0.314 |
| 2.6 | MC | 0.184 | 0.222 |
| 2.6 | MG | 0.119 | 0.146 |
| 2.6 | MI | 0.314 | 0.324 |
| 2.6 | MP | 0.162 | 0.189 |
| 2.6 | MR | 0.308 | 0.330 |
| 2.6 | NO | 0.119 | 0.157 |
| 4.5 | AC | 0.324 | 0.411 |
| 4.5 | BC | 0.200 | 0.238 |
| 4.5 | CC | 0.232 | 0.319 |
| 4.5 | CE | 0.643 | 0.735 |
| 4.5 | CN | 0.238 | 0.276 |
| 4.5 | GD | 0.211 | 0.292 |
| 4.5 | GF | 0.578 | 0.681 |
| 4.5 | GS | 0.200 | 0.238 |
| 4.5 | HD | 0.357 | 0.443 |
| 4.5 | HE | 0.368 | 0.459 |
| 4.5 | HG | 0.319 | 0.400 |
| 4.5 | IN | 0.092 | 0.135 |
| 4.5 | IP | 0.357 | 0.443 |
| 4.5 | MC | 0.286 | 0.378 |

---

---

|     |    |       |       |
|-----|----|-------|-------|
| 4.5 | MG | 0.211 | 0.286 |
| 4.5 | MI | 0.416 | 0.481 |
| 4.5 | MP | 0.292 | 0.368 |
| 4.5 | MR | 0.411 | 0.486 |
| 4.5 | NO | 0.243 | 0.303 |
| 6   | BC | 0.254 | 0.292 |
| 6   | CC | 0.254 | 0.335 |
| 6   | GD | 0.216 | 0.254 |
| 6   | GS | 0.243 | 0.335 |
| 6   | HD | 0.341 | 0.432 |
| 6   | HE | 0.400 | 0.476 |
| 6   | IP | 0.368 | 0.449 |
| 6   | MC | 0.308 | 0.400 |
| 6   | MG | 0.222 | 0.303 |
| 6   | MI | 0.443 | 0.503 |
| 6   | MR | 0.416 | 0.470 |
| 6   | NO | 0.249 | 0.276 |
| 8.5 | AC | 0.578 | 0.676 |
| 8.5 | BC | 0.341 | 0.427 |
| 8.5 | CC | 0.416 | 0.514 |
| 8.5 | CN | 0.373 | 0.449 |

---



---

|     |    |       |       |
|-----|----|-------|-------|
| 8.5 | GF | 0.768 | 0.859 |
| 8.5 | GS | 0.346 | 0.411 |
| 8.5 | HD | 0.524 | 0.611 |
| 8.5 | HE | 0.654 | 0.741 |
| 8.5 | HG | 0.649 | 0.735 |
| 8.5 | IN | 0.232 | 0.330 |
| 8.5 | IP | 0.703 | 0.789 |
| 8.5 | MC | 0.551 | 0.649 |
| 8.5 | MG | 0.384 | 0.443 |
| 8.5 | MI | 0.546 | 0.616 |
| 8.5 | MP | 0.535 | 0.611 |
| 8.5 | MR | 0.659 | 0.724 |
| 8.5 | NO | 0.427 | 0.524 |

---

**Table S8.** Estimated level of extinction assuming that all species respond to climate change only by dispersing. We include species that dispersed upwards between surveys, in addition to species that dispersed downwards or did not disperse between surveys. We show estimates for the proportion of these 538 species projected to go extinct by 2070, for three alternative dispersal scenarios. Scenario 1: we assumed that species that did not previously disperse upwards (at their upper elevational range limits) between surveys would not disperse upwards in the future. Scenario 2: we assumed that these previously non-dispersing species would instead move upwards at the mean upward rate across all species that did disperse upwards (including downward dispersal as negative values when calculating the mean). Scenario 3: we assumed that these previously non-dispersing species would instead move upwards at the mean upward rate across all species (including downward dispersal as negative values when calculating the mean and counting non-dispersing species as zero). For each of these three scenarios, we also estimated the projected proportion of extinctions if species are not restricted by the height of the mountain range on which the survey was undertaken (unconstrained), or if species can only disperse until they reach the highest elevation possible on the mountain range containing their elevational transect (i.e. the top of the mountain range; constrained). Results are shown for multiple climatic scenarios based on the 12–19 available GCMs for each of the four RCPs. We present results for two different RCPs in the main text: RCP4.5 and RCP8.5. For each of these two RCPs, we simply averaged the extinction frequency across all nested GCMs. Not all combinations of GCMs and RCPs are available. The species-level data are presented in Dataset S6, along with model abbreviations.

| RCP | GCM | Scenario1_Unconstrained | Scenario1_Constrained | Scenario2_Unconstrained | Scenario2_Constrained | Scenario3_Unconstrained | Scenario3_Constrained |
|-----|-----|-------------------------|-----------------------|-------------------------|-----------------------|-------------------------|-----------------------|
| 2.6 | BC  | 0.416                   | 0.428                 | 0.416                   | 0.428                 | 0.416                   | 0.428                 |
| 2.6 | CC  | 0.416                   | 0.426                 | 0.416                   | 0.426                 | 0.416                   | 0.426                 |
| 2.6 | CN  | 0.420                   | 0.429                 | 0.420                   | 0.429                 | 0.420                   | 0.429                 |
| 2.6 | GD  | 0.314                   | 0.325                 | 0.314                   | 0.325                 | 0.314                   | 0.325                 |
| 2.6 | GF  | 0.593                   | 0.612                 | 0.593                   | 0.612                 | 0.593                   | 0.612                 |

---

|     |    |       |       |       |       |       |       |
|-----|----|-------|-------|-------|-------|-------|-------|
| 2.6 | GS | 0.362 | 0.375 | 0.362 | 0.375 | 0.362 | 0.375 |
| 2.6 | HD | 0.303 | 0.316 | 0.303 | 0.316 | 0.303 | 0.316 |
| 2.6 | HE | 0.507 | 0.537 | 0.507 | 0.537 | 0.507 | 0.537 |
| 2.6 | IP | 0.468 | 0.496 | 0.468 | 0.496 | 0.468 | 0.496 |
| 2.6 | MC | 0.476 | 0.489 | 0.476 | 0.489 | 0.476 | 0.489 |
| 2.6 | MG | 0.374 | 0.383 | 0.374 | 0.383 | 0.374 | 0.383 |
| 2.6 | MI | 0.604 | 0.608 | 0.604 | 0.608 | 0.604 | 0.608 |
| 2.6 | MP | 0.388 | 0.398 | 0.388 | 0.398 | 0.388 | 0.398 |
| 2.6 | MR | 0.554 | 0.561 | 0.554 | 0.561 | 0.554 | 0.561 |
| 2.6 | NO | 0.442 | 0.455 | 0.442 | 0.455 | 0.442 | 0.455 |
|     |    |       |       |       |       |       |       |
| 4.5 | AC | 0.522 | 0.552 | 0.522 | 0.552 | 0.522 | 0.552 |
| 4.5 | BC | 0.459 | 0.472 | 0.459 | 0.472 | 0.459 | 0.472 |
| 4.5 | CC | 0.485 | 0.515 | 0.485 | 0.515 | 0.485 | 0.515 |
| 4.5 | CE | 0.730 | 0.762 | 0.730 | 0.762 | 0.730 | 0.762 |
| 4.5 | CN | 0.530 | 0.543 | 0.530 | 0.543 | 0.530 | 0.543 |
| 4.5 | GD | 0.463 | 0.491 | 0.463 | 0.491 | 0.463 | 0.491 |
| 4.5 | GF | 0.716 | 0.751 | 0.716 | 0.751 | 0.716 | 0.751 |
| 4.5 | GS | 0.467 | 0.480 | 0.467 | 0.480 | 0.467 | 0.480 |
| 4.5 | HD | 0.569 | 0.599 | 0.569 | 0.599 | 0.569 | 0.599 |
| 4.5 | HE | 0.617 | 0.649 | 0.617 | 0.649 | 0.617 | 0.649 |
| 4.5 | HG | 0.556 | 0.584 | 0.556 | 0.584 | 0.556 | 0.584 |

---

---

|     |    |       |       |       |       |       |       |
|-----|----|-------|-------|-------|-------|-------|-------|
| 4.5 | IN | 0.375 | 0.390 | 0.375 | 0.390 | 0.375 | 0.390 |
| 4.5 | IP | 0.552 | 0.582 | 0.552 | 0.582 | 0.552 | 0.582 |
| 4.5 | MC | 0.576 | 0.608 | 0.576 | 0.608 | 0.576 | 0.608 |
| 4.5 | MG | 0.422 | 0.448 | 0.422 | 0.448 | 0.422 | 0.448 |
| 4.5 | MI | 0.686 | 0.708 | 0.686 | 0.708 | 0.686 | 0.708 |
| 4.5 | MP | 0.472 | 0.498 | 0.472 | 0.498 | 0.472 | 0.498 |
| 4.5 | MR | 0.665 | 0.691 | 0.665 | 0.691 | 0.665 | 0.691 |
| 4.5 | NO | 0.509 | 0.530 | 0.509 | 0.530 | 0.509 | 0.530 |
| 6   | BC | 0.489 | 0.502 | 0.489 | 0.502 | 0.489 | 0.502 |
| 6   | CC | 0.494 | 0.522 | 0.494 | 0.522 | 0.494 | 0.522 |
| 6   | GD | 0.481 | 0.494 | 0.481 | 0.494 | 0.481 | 0.494 |
| 6   | GS | 0.487 | 0.519 | 0.487 | 0.519 | 0.487 | 0.519 |
| 6   | HD | 0.572 | 0.604 | 0.572 | 0.604 | 0.572 | 0.604 |
| 6   | HE | 0.649 | 0.675 | 0.649 | 0.675 | 0.649 | 0.675 |
| 6   | IP | 0.554 | 0.582 | 0.554 | 0.582 | 0.554 | 0.582 |
| 6   | MC | 0.537 | 0.569 | 0.537 | 0.569 | 0.537 | 0.569 |
| 6   | MG | 0.454 | 0.481 | 0.454 | 0.481 | 0.454 | 0.481 |
| 6   | MI | 0.704 | 0.725 | 0.704 | 0.725 | 0.704 | 0.725 |
| 6   | MR | 0.647 | 0.665 | 0.647 | 0.665 | 0.647 | 0.665 |
| 6   | NO | 0.500 | 0.509 | 0.500 | 0.509 | 0.500 | 0.509 |

---

---

|     |    |       |       |       |       |       |       |       |       |
|-----|----|-------|-------|-------|-------|-------|-------|-------|-------|
| 8.5 | AC | 0.701 | 0.734 | 0.701 | 0.734 | 0.701 | 0.734 | 0.701 | 0.734 |
| 8.5 | BC | 0.532 | 0.561 | 0.532 | 0.561 | 0.532 | 0.561 | 0.532 | 0.561 |
| 8.5 | CC | 0.625 | 0.658 | 0.625 | 0.658 | 0.625 | 0.658 | 0.625 | 0.658 |
| 8.5 | CN | 0.621 | 0.647 | 0.621 | 0.647 | 0.621 | 0.647 | 0.621 | 0.647 |
| 8.5 | GF | 0.820 | 0.851 | 0.820 | 0.851 | 0.820 | 0.851 | 0.820 | 0.851 |
| 8.5 | GS | 0.586 | 0.608 | 0.586 | 0.608 | 0.586 | 0.608 | 0.586 | 0.608 |
| 8.5 | HD | 0.727 | 0.757 | 0.727 | 0.757 | 0.727 | 0.757 | 0.727 | 0.757 |
| 8.5 | HE | 0.781 | 0.810 | 0.781 | 0.810 | 0.781 | 0.810 | 0.781 | 0.810 |
| 8.5 | HG | 0.773 | 0.803 | 0.773 | 0.803 | 0.773 | 0.803 | 0.773 | 0.803 |
| 8.5 | IN | 0.452 | 0.485 | 0.452 | 0.485 | 0.452 | 0.485 | 0.452 | 0.485 |
| 8.5 | IP | 0.760 | 0.790 | 0.760 | 0.790 | 0.760 | 0.790 | 0.760 | 0.790 |
| 8.5 | MC | 0.714 | 0.747 | 0.714 | 0.747 | 0.714 | 0.747 | 0.714 | 0.747 |
| 8.5 | MG | 0.561 | 0.582 | 0.561 | 0.582 | 0.561 | 0.582 | 0.561 | 0.582 |
| 8.5 | MI | 0.749 | 0.773 | 0.749 | 0.773 | 0.749 | 0.773 | 0.749 | 0.773 |
| 8.5 | MP | 0.608 | 0.634 | 0.608 | 0.634 | 0.608 | 0.634 | 0.608 | 0.634 |
| 8.5 | MR | 0.788 | 0.810 | 0.788 | 0.810 | 0.788 | 0.810 | 0.788 | 0.810 |
| 8.5 | NO | 0.651 | 0.684 | 0.651 | 0.684 | 0.651 | 0.684 | 0.651 | 0.684 |

---

**Table S9.** Estimated level of extinction assuming that species respond to climate change by shifting their climatic niches. We estimate the proportion of all 538 species that are projected to go extinct (within their transect) by 2070, assuming that these species can respond to climate change only by shifting their climatic niches, not by dispersing. For each species we evaluated whether all sites across their current range will warm above the estimated threshold for maximum annual temperatures that typically leads to local extinction, using two different thresholds. First, we used the increase in maximum annual temperature (Bio5) at which 95% of the species experienced local extinction at their warmest site (2.860°C). Second, we used the increase in maximum annual temperature at which 50% of the species experienced local extinction at their warmest site (0.519°C). For the 0.50 threshold, we assumed that only 50% of the species that experienced temperatures above this threshold would go extinct. Results are shown for multiple climatic scenarios based on 12–19 GCMs and all four RCPs. We present results for two different RCPs in the main text: RCP4.5 and RCP8.5. For each of these two RCPs, we averaged the extinction frequency across all nested GCMs. Not all combinations of RCPs and GCMs are available (especially for RCP 2.6 and 6). Species-level data are presented in Dataset S7, along with model abbreviations.

| RCP | GCM | Extinction frequency                 |                                      |
|-----|-----|--------------------------------------|--------------------------------------|
|     |     | Niche shift threshold=0.95 (2.860°C) | Niche shift threshold=0.50 (0.519°C) |
| 2.6 | BC  | 0.000                                | 0.117                                |
| 2.6 | CC  | 0.000                                | 0.124                                |
| 2.6 | CN  | 0.000                                | 0.121                                |
| 2.6 | GD  | 0.000                                | 0.079                                |

---

|     |    |       |       |
|-----|----|-------|-------|
| 2.6 | GF | 0.216 | 0.399 |
| 2.6 | GS | 0.000 | 0.105 |
| 2.6 | HD | 0.002 | 0.176 |
| 2.6 | HE | 0.000 | 0.315 |
| 2.6 | IP | 0.000 | 0.340 |
| 2.6 | MC | 0.000 | 0.326 |
| 2.6 | MG | 0.000 | 0.096 |
| 2.6 | MI | 0.221 | 0.298 |
| 2.6 | MP | 0.000 | 0.252 |
| 2.6 | MR | 0.180 | 0.350 |
| 2.6 | NO | 0.000 | 0.141 |
|     |    |       |       |
| 4.5 | AC | 0.052 | 0.364 |
| 4.5 | BC | 0.002 | 0.322 |
| 4.5 | CC | 0.004 | 0.352 |
| 4.5 | CE | 0.231 | 0.418 |
| 4.5 | CN | 0.000 | 0.368 |
| 4.5 | GD | 0.091 | 0.248 |
| 4.5 | GF | 0.257 | 0.424 |
| 4.5 | GS | 0.000 | 0.316 |
| 4.5 | HD | 0.152 | 0.380 |
| 4.5 | HE | 0.130 | 0.399 |
| 4.5 | HG | 0.034 | 0.374 |

---

---

|     |    |       |       |
|-----|----|-------|-------|
| 4.5 | IN | 0.000 | 0.089 |
| 4.5 | IP | 0.091 | 0.367 |
| 4.5 | MC | 0.104 | 0.386 |
| 4.5 | MG | 0.000 | 0.304 |
| 4.5 | MI | 0.223 | 0.443 |
| 4.5 | MP | 0.080 | 0.339 |
| 4.5 | MR | 0.232 | 0.421 |
| 4.5 | NO | 0.034 | 0.365 |
| 6   | BC | 0.048 | 0.356 |
| 6   | CC | 0.004 | 0.355 |
| 6   | GD | 0.091 | 0.339 |
| 6   | GS | 0.000 | 0.349 |
| 6   | HD | 0.041 | 0.385 |
| 6   | HE | 0.167 | 0.415 |
| 6   | IP | 0.091 | 0.366 |
| 6   | MC | 0.011 | 0.366 |
| 6   | MG | 0.000 | 0.326 |
| 6   | MI | 0.294 | 0.459 |
| 6   | MR | 0.245 | 0.417 |
| 6   | NO | 0.004 | 0.358 |
| 8.5 | AC | 0.303 | 0.414 |

---



---

|     |    |       |       |
|-----|----|-------|-------|
| 8.5 | BC | 0.206 | 0.369 |
| 8.5 | CC | 0.143 | 0.396 |
| 8.5 | CN | 0.106 | 0.399 |
| 8.5 | GF | 0.771 | 0.468 |
| 8.5 | GS | 0.054 | 0.379 |
| 8.5 | HD | 0.316 | 0.447 |
| 8.5 | HE | 0.431 | 0.467 |
| 8.5 | HG | 0.385 | 0.461 |
| 8.5 | IN | 0.026 | 0.337 |
| 8.5 | IP | 0.701 | 0.421 |
| 8.5 | MC | 0.218 | 0.424 |
| 8.5 | MG | 0.164 | 0.365 |
| 8.5 | MI | 0.444 | 0.475 |
| 8.5 | MP | 0.258 | 0.376 |
| 8.5 | MR | 0.429 | 0.474 |
| 8.5 | NO | 0.218 | 0.412 |

---

**Table S10.** Estimated level of extinction assuming that species respond to climate change by both dispersing and shifting their climatic niches. For each of the analyzed species ( $n=538$ ), we estimated if dispersal could decrease the change in maximum annual temperatures that a species experiences to below the estimated threshold for local extinction (i.e. the amount of niche shift possible without extinction). We used two different thresholds. First, the increase in maximum annual temperature at which 95% of the species experienced local extinction at their warmest site ( $2.860^{\circ}\text{C}$ ). Second, the increase in maximum annual temperature at which 50% of the species experienced local extinction at their warmest site ( $0.519^{\circ}\text{C}$ ). For the 0.50 threshold, we assumed that only 50% of the species that experienced temperatures above this threshold would go extinct. We explored three different dispersal scenarios. Scenario 1: we assumed that species that did not previously disperse upwards (at their upper elevational range limits) between surveys would not disperse upwards in the future. Scenario 2: we assumed that these previously non-dispersing species would instead move upwards at the mean upward rate across all species that dispersed (including downward dispersal as negative values when calculating the mean). Scenario 3: we assumed that these previously non-dispersing species would instead move upwards at the mean upward rate across all species (counting non-dispersing species as zero when calculating the mean and including downward dispersal as negative values). Results are shown for multiple climatic scenarios based on the 12–19 GCMs and all four RCPs. We present results for two different RCPs in the main text: RCP4.5 and RCP8.5. For each of these two RCPs, we simply averaged the extinction frequency across all nested GCMs. Not all combinations are available. The species-level data are presented in Dataset S8 for the first scenario, Dataset S9 for the second, and Dataset S10 for the third. Model abbreviations are explained in Dataset S8.

| RCP | GCM | Niche shift threshold=0.95 (2.860°C) |            |            | Niche shift threshold=0.5 (0.519°C) |            |            |
|-----|-----|--------------------------------------|------------|------------|-------------------------------------|------------|------------|
|     |     | Scenario 1                           | Scenario 2 | Scenario 3 | Scenario 1                          | Scenario 2 | Scenario 3 |
| 2.6 | BC  | 0.056                                | 0.056      | 0.056      | 0.137                               | 0.129      | 0.130      |
| 2.6 | CC  | 0.052                                | 0.052      | 0.052      | 0.133                               | 0.118      | 0.123      |
| 2.6 | CN  | 0.052                                | 0.052      | 0.052      | 0.144                               | 0.130      | 0.135      |
| 2.6 | GD  | 0.043                                | 0.041      | 0.041      | 0.111                               | 0.112      | 0.112      |
| 2.6 | GF  | 0.231                                | 0.238      | 0.238      | 0.309                               | 0.305      | 0.309      |
| 2.6 | GS  | 0.054                                | 0.050      | 0.054      | 0.113                               | 0.111      | 0.112      |
| 2.6 | HD  | 0.048                                | 0.043      | 0.043      | 0.129                               | 0.130      | 0.133      |
| 2.6 | HE  | 0.069                                | 0.067      | 0.067      | 0.231                               | 0.225      | 0.234      |
| 2.6 | IP  | 0.097                                | 0.091      | 0.091      | 0.239                               | 0.235      | 0.240      |
| 2.6 | MC  | 0.089                                | 0.087      | 0.087      | 0.225                               | 0.226      | 0.227      |
| 2.6 | MG  | 0.052                                | 0.052      | 0.052      | 0.116                               | 0.107      | 0.108      |
| 2.6 | MI  | 0.199                                | 0.193      | 0.199      | 0.257                               | 0.247      | 0.256      |
| 2.6 | MP  | 0.082                                | 0.080      | 0.080      | 0.188                               | 0.185      | 0.188      |
| 2.6 | MR  | 0.225                                | 0.212      | 0.206      | 0.273                               | 0.260      | 0.273      |
| 2.6 | NO  | 0.060                                | 0.058      | 0.058      | 0.139                               | 0.138      | 0.141      |
| 4.5 | AC  | 0.128                                | 0.110      | 0.110      | 0.280                               | 0.282      | 0.283      |
| 4.5 | BC  | 0.078                                | 0.071      | 0.071      | 0.225                               | 0.218      | 0.229      |
| 4.5 | CC  | 0.089                                | 0.087      | 0.087      | 0.249                               | 0.248      | 0.251      |
| 4.5 | CE  | 0.283                                | 0.292      | 0.290      | 0.377                               | 0.371      | 0.374      |

---

|     |    |       |       |       |       |       |       |
|-----|----|-------|-------|-------|-------|-------|-------|
| 4.5 | CN | 0.087 | 0.086 | 0.086 | 0.263 | 0.256 | 0.260 |
| 4.5 | GD | 0.128 | 0.132 | 0.132 | 0.198 | 0.174 | 0.179 |
| 4.5 | GF | 0.303 | 0.307 | 0.305 | 0.363 | 0.360 | 0.362 |
| 4.5 | GS | 0.091 | 0.069 | 0.069 | 0.230 | 0.221 | 0.234 |
| 4.5 | HD | 0.197 | 0.173 | 0.175 | 0.302 | 0.304 | 0.304 |
| 4.5 | HE | 0.184 | 0.152 | 0.152 | 0.320 | 0.315 | 0.319 |
| 4.5 | HG | 0.119 | 0.100 | 0.100 | 0.289 | 0.286 | 0.290 |
| 4.5 | IN | 0.050 | 0.050 | 0.050 | 0.105 | 0.084 | 0.101 |
| 4.5 | IP | 0.178 | 0.164 | 0.162 | 0.289 | 0.284 | 0.289 |
| 4.5 | MC | 0.178 | 0.152 | 0.151 | 0.287 | 0.284 | 0.287 |
| 4.5 | MG | 0.082 | 0.082 | 0.082 | 0.221 | 0.217 | 0.218 |
| 4.5 | MI | 0.281 | 0.266 | 0.264 | 0.351 | 0.348 | 0.351 |
| 4.5 | MP | 0.149 | 0.132 | 0.132 | 0.257 | 0.258 | 0.260 |
| 4.5 | MR | 0.284 | 0.266 | 0.266 | 0.325 | 0.326 | 0.327 |
| 4.5 | NO | 0.102 | 0.099 | 0.099 | 0.252 | 0.253 | 0.255 |
| 6   | BC | 0.125 | 0.106 | 0.106 | 0.248 | 0.246 | 0.250 |
| 6   | CC | 0.100 | 0.093 | 0.093 | 0.253 | 0.254 | 0.256 |
| 6   | GD | 0.171 | 0.156 | 0.154 | 0.237 | 0.230 | 0.232 |
| 6   | GS | 0.113 | 0.091 | 0.091 | 0.248 | 0.246 | 0.249 |
| 6   | HD | 0.126 | 0.108 | 0.108 | 0.282 | 0.278 | 0.281 |
| 6   | HE | 0.219 | 0.204 | 0.203 | 0.336 | 0.334 | 0.337 |
| 6   | IP | 0.180 | 0.165 | 0.164 | 0.289 | 0.288 | 0.290 |

---

---

|     |    |       |       |       |       |       |       |
|-----|----|-------|-------|-------|-------|-------|-------|
| 6   | MC | 0.106 | 0.099 | 0.099 | 0.270 | 0.265 | 0.268 |
| 6   | MG | 0.089 | 0.087 | 0.087 | 0.246 | 0.239 | 0.244 |
| 6   | MI | 0.314 | 0.316 | 0.318 | 0.365 | 0.365 | 0.368 |
| 6   | MR | 0.271 | 0.279 | 0.273 | 0.330 | 0.324 | 0.329 |
| 6   | NO | 0.115 | 0.093 | 0.093 | 0.253 | 0.248 | 0.253 |
| 8.5 | AC | 0.299 | 0.296 | 0.301 | 0.358 | 0.353 | 0.355 |
| 8.5 | BC | 0.214 | 0.225 | 0.223 | 0.285 | 0.286 | 0.286 |
| 8.5 | CC | 0.227 | 0.214 | 0.214 | 0.329 | 0.323 | 0.328 |
| 8.5 | CN | 0.184 | 0.167 | 0.167 | 0.317 | 0.313 | 0.316 |
| 8.5 | GF | 0.548 | 0.554 | 0.545 | 0.444 | 0.444 | 0.445 |
| 8.5 | GS | 0.128 | 0.125 | 0.125 | 0.293 | 0.286 | 0.289 |
| 8.5 | HD | 0.327 | 0.340 | 0.333 | 0.383 | 0.382 | 0.383 |
| 8.5 | HE | 0.420 | 0.431 | 0.424 | 0.410 | 0.407 | 0.410 |
| 8.5 | HG | 0.357 | 0.364 | 0.364 | 0.402 | 0.403 | 0.403 |
| 8.5 | IN | 0.115 | 0.097 | 0.097 | 0.234 | 0.236 | 0.239 |
| 8.5 | IP | 0.476 | 0.480 | 0.478 | 0.390 | 0.388 | 0.392 |
| 8.5 | MC | 0.253 | 0.260 | 0.262 | 0.355 | 0.353 | 0.354 |
| 8.5 | MG | 0.197 | 0.201 | 0.199 | 0.286 | 0.285 | 0.286 |
| 8.5 | MI | 0.457 | 0.467 | 0.465 | 0.407 | 0.410 | 0.410 |
| 8.5 | MP | 0.279 | 0.290 | 0.286 | 0.310 | 0.311 | 0.311 |
| 8.5 | MR | 0.448 | 0.455 | 0.454 | 0.414 | 0.415 | 0.417 |
| 8.5 | NO | 0.231 | 0.238 | 0.240 | 0.329 | 0.326 | 0.326 |

---
